# Supplementary material for: Data on Mapping 444 Dairy Small Ruminant Farms during a Countrywide Investigation Performed in Greece
Source: MDPI journal article supplement (doi:10.3390/ani13122044), 2023-06-20
Supplement: s1 [file s1]

---

# Data of Mapping 444 Dairy Small Ruminant Farms during a Countrywide Investigation Performed in Greece

Daphne T. Lianou, Charalambia K. Michael and George C. Fthenakis

**Table S1.** Geographical areas of Greece ( $n = 4$ ), in which administrative regions and regional units of the country were clustered, for characterizing location of 444 small ruminant farms in a countrywide investigation in Greece.

|                                                                                      |
|--------------------------------------------------------------------------------------|
| <b>Central</b>                                                                       |
| Region of Central Greece                                                             |
| Region of Thessaly                                                                   |
| From the region of Epirus: regional unit of Arta and regional unit of Preveza        |
| From the region of Western Greece: regional unit of Aetolia-Acarnania                |
| <b>Islands</b>                                                                       |
| Region of Crete                                                                      |
| Region of Ionian islands                                                             |
| Region of North Aegean                                                               |
| Region of South Aegean                                                               |
| <b>North</b>                                                                         |
| Region of Central Macedonia                                                          |
| Region of Eastern Macedonia and Thrace                                               |
| Region of Western Macedonia                                                          |
| From the region of Epirus: regional unit of Ioannina and regional unit of Thesprotia |
| <b>South</b>                                                                         |
| Region of Attica                                                                     |
| Region of Peloponnese                                                                |
| Region of Western Macedonia                                                          |
| From the region of Western Greece: regional unit of Achaea and regional unit of Elis |

---

**Figure S1.** Map of Greece indicating the geographic areas of the country ( $n = 4$ ), in which administrative regions and regional units of the country were clustered, for characterizing location of 444 small ruminant farms in a countrywide investigation in Greece (blue: Central, green: Islands, yellow: North, red: South).

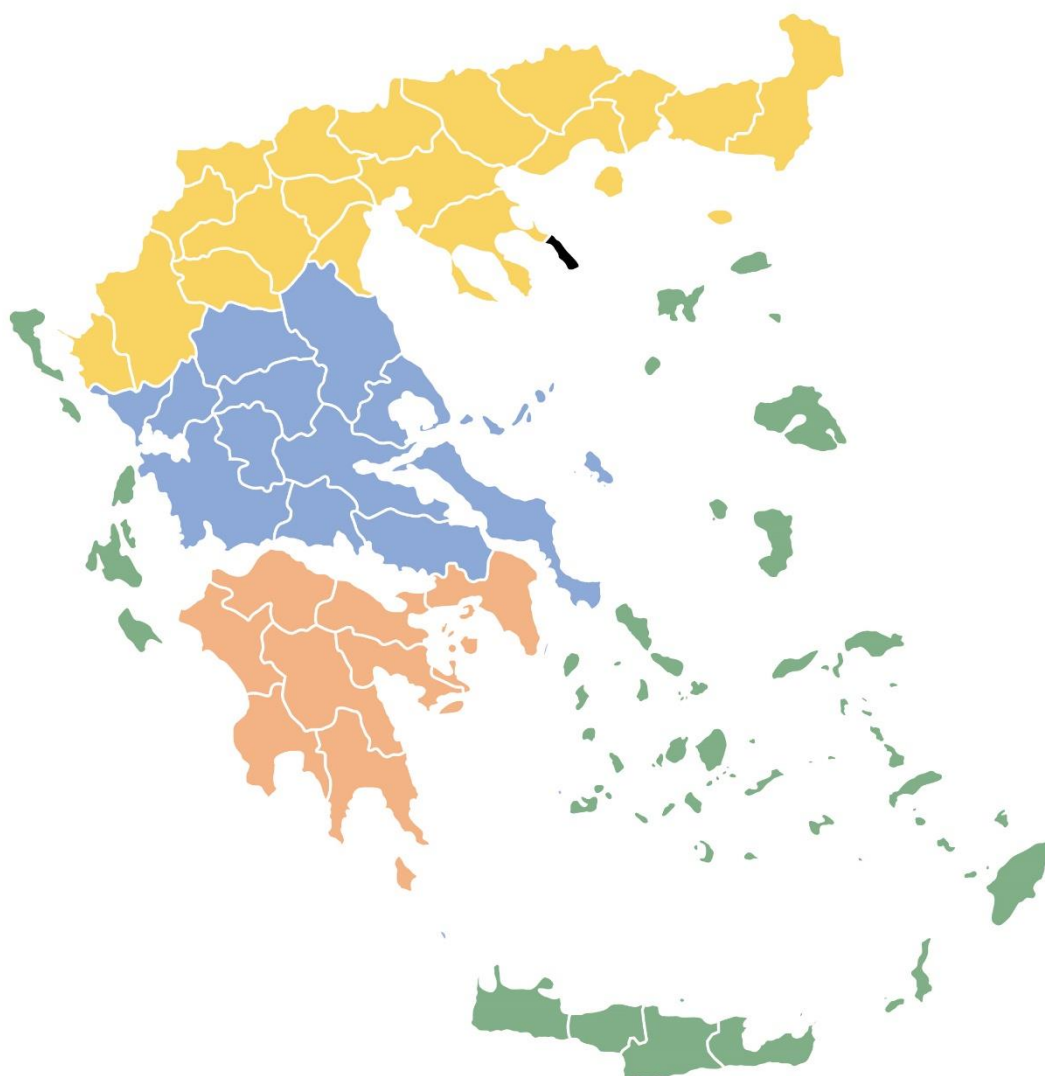

**Table S2.** Cumulative findings of all data collected during mapping 444 small ruminant farms in a countrywide investigation in Greece, classified according to animal species in the farms.

|                                                             | SHEEP FLOCKS<br><i>n</i> = 325                                                                                                  | GOAT HERDS<br><i>n</i> = 199                                                                                                  | <i>p</i> -value <sup>1</sup>       |
|-------------------------------------------------------------|---------------------------------------------------------------------------------------------------------------------------------|-------------------------------------------------------------------------------------------------------------------------------|------------------------------------|
| <b>GENERAL DETAILS</b>                                      |                                                                                                                                 |                                                                                                                               |                                    |
| Management system <sup>2</sup>                              | Intensive: 44, semi-intensive: 140, semi-extensive: 116, extensive: 25                                                          | Intensive: 9, semi-intensive: 29, semi-extensive: 61, extensive: 20                                                           | < 0.0001 <sup>3</sup>              |
| <b>INFRASTRUCTURE</b>                                       |                                                                                                                                 |                                                                                                                               |                                    |
| <b>General information</b>                                  |                                                                                                                                 |                                                                                                                               |                                    |
| Year of the initial establishment of the farm               | $\bar{X}$ : year 1981 $\pm$ 1 year <sup>4</sup>                                                                                 | $\bar{X}$ : year 1977 $\pm$ 1 year                                                                                            | 0.09                               |
| Year of establishment at the present location               | $\bar{X}$ : year 2000 $\pm$ 1 year                                                                                              | $\bar{X}$ : year 2000 $\pm$ 1 year                                                                                            | 0.93                               |
| Availability of a main building for animals                 | Yes: 318, no: 7 <sup>5</sup>                                                                                                    | Yes: 117, no: 2                                                                                                               | 0.75                               |
| Availability of a dedicated building for lambs / kids       | Yes: 243, no: 82                                                                                                                | Yes: 86, no: 33                                                                                                               | 0.59                               |
| Availability of a separate lambing / kidding area           | Yes: 173, no: 152                                                                                                               | Yes: 58, no: 61                                                                                                               | 0.40                               |
| Is the separate lambing / kidding area permanent            | Yes: 84, no: 89                                                                                                                 | Yes: 31, no: 27                                                                                                               | 0.52                               |
| Accessory building(s) for animals                           | Yes: 222, no: 103                                                                                                               | Yes: 93, no: 26                                                                                                               | 0.043                              |
| Availability of sheds                                       | Yes: 233, no: 92                                                                                                                | Yes: 96, no: 23                                                                                                               | 0.06                               |
| Number of available sheds                                   | $\bar{X}$ : 2 $\pm$ 0.1 sheds                                                                                                   | $\bar{X}$ : 2 $\pm$ 0.1 sheds                                                                                                 | 0.50                               |
| Availability of sheds for storage of concentrate feedstuffs | Yes: 277, no: 48                                                                                                                | Yes: 106, no: 13                                                                                                              | 0.30                               |
| Availability of sheds for storage of roughage               | Yes: 281, no: 44                                                                                                                | Yes: 100, no: 19                                                                                                              | 0.52                               |
| Availability of sheds for storage of silage                 | Yes: 64, no: 261                                                                                                                | Yes: 16, no: 103                                                                                                              | 0.13                               |
| Availability of a milking parlour                           | Yes: 255, no: 70                                                                                                                | Yes: 66, no: 53                                                                                                               | < 0.0001                           |
| Availability of a waiting area before the milking parlour   | Yes: 226, no: 29                                                                                                                | Yes: 64, no: 2                                                                                                                | 0.041                              |
| Availability of personnel areas                             | Yes: 179, no: 145                                                                                                               | Yes: 40, no: 79                                                                                                               | 0.009                              |
| Availability of area for veterinary works                   | Yes: 63, no: 262                                                                                                                | Yes: 14, no: 105                                                                                                              | 0.06                               |
| Availability of an office                                   | Yes: 128, no: 197                                                                                                               | Yes: 34, no: 85                                                                                                               | 0.036                              |
| Availability of a lavatory                                  | Yes: 143, no: 182                                                                                                               | Yes: 38, no: 81                                                                                                               | 0.022                              |
| Availability of footbath                                    | Yes: 45, no: 280                                                                                                                | Yes: 10, no: 109                                                                                                              | 0.005                              |
| Availability of isolation facilities for animals            | Yes: 247, no: 78                                                                                                                | Yes: 77, no: 42                                                                                                               | 0.018                              |
| Availability of access road to the farm                     | Yes: 251, no: 74                                                                                                                | Yes: 78, no: 41                                                                                                               | 0.013                              |
| Availability of electricity:                                | Yes: 293, no: 32                                                                                                                | Yes: 104, no: 15                                                                                                              | 0.40                               |
| Electricity source                                          | National network: 253, diesel generator: 48, own solar cells: 0                                                                 | National network: 72, diesel generator: 29, own solar cells: 3                                                                | 0.0002                             |
| Proximity to industrial sites                               | Yes: 54, no: 271                                                                                                                | Yes: 12, no: 107                                                                                                              | 0.09                               |
| Distance to industrial sites                                | $\bar{X}$ : 1.9 $\pm$ 0.1 km                                                                                                    | $\bar{X}$ : 2.1 $\pm$ 0.2 km                                                                                                  | 0.72                               |
| Type of industrial sites near the farm                      | Food processing: 27, Construction-related: 11, Other light industries: 8, Heavy industries: 9                                   | Food processing: 5, Construction-related: 3, Other light industries: 1, Heavy industries: 3                                   | 0.90                               |
| Availability of waste processing facility                   | Yes: 3, no: 322                                                                                                                 | Yes: 1, no: 118                                                                                                               | 0.93                               |
| Availability of a ditch at the main entrance                | Yes: 0, no: 325                                                                                                                 | Yes: 0, no: 119                                                                                                               | n/a                                |
| Recording of details of incoming vehicles                   | Yes: 19, no: 306                                                                                                                | Yes: 8, no: 111                                                                                                               | 0.73                               |
| <b>Main building</b>                                        |                                                                                                                                 |                                                                                                                               |                                    |
| Material of the walls                                       | Cinder blocks: 130, tin: 99, bricks: 69, panels: 44, wood: 21, cement: 7, stone: 5, canvas: 4, nylon: 4, plaster: 1, plastic: 1 | Cinder blocks: 57, tin: 38, bricks: 19, panels: 13, wood: 8, cement: 2, stone: 7, canvas: 0, nylon: 1, plaster: 0, plastic: 0 | stone: 0.014<br>all others: > 0.08 |
| Material of the roof                                        | Tin: 213, panels: 82, tiles: 15, wood: 15, canvas: 7, cinder blocks: 6, bricks: 2, cement: 0                                    | Tin: 81, panels: 22, tiles: 5, wood: 7, canvas: 2, cinder blocks: 3, bricks: 0, cement: 2                                     | all: > 0.25                        |

|                                                                               |                                                                                                                                                             |                                                                                                                                                               |                                                |
|-------------------------------------------------------------------------------|-------------------------------------------------------------------------------------------------------------------------------------------------------------|---------------------------------------------------------------------------------------------------------------------------------------------------------------|------------------------------------------------|
| Dimensions of the building                                                    | Length: $\bar{X}$ : 9.4 ± 0.2 m<br>Width: $\bar{X}$ : 5.0 ± 0.1 m<br>Height: $\bar{X}$ : 3.7 ± 0.1 m<br>Total volume:<br>$\bar{X}$ : 146 ± 8 m <sup>3</sup> | Length: $\bar{X}$ : 10.0 ± 0.4 m<br>Width: $\bar{X}$ : 5.1 ± 0.2 m<br>Height: $\bar{X}$ : 3.8 ± 0.1 m<br>Total volume:<br>$\bar{X}$ : 126 ± 18 m <sup>3</sup> | > 0.14                                         |
| Openings in the walls                                                         | Yes: 314, no: 4                                                                                                                                             | Yes: 115, no: 2                                                                                                                                               | 0.72                                           |
| Number of openings in the walls                                               | All around: 174, remaining:<br>$\bar{X}$ : 10 ± 0.5 openings                                                                                                | All around: 60, remaining:<br>$\bar{X}$ : 12 ± 1.4 openings                                                                                                   | 0.55                                           |
| Opening in the roof                                                           | Yes: 234, no: 84                                                                                                                                            | Yes: 35, no: 82                                                                                                                                               | < 0.0001                                       |
| Orientation of the building                                                   | $\bar{X}$ : 136 ± 6 °                                                                                                                                       | $\bar{X}$ : 131 ± 8 °                                                                                                                                         | 0.76                                           |
| Material of the floor                                                         | Soil: 293, concrete: 29, stone: 16, slatted metal: 2, slatted wood: 2, slatted plastic: 1, wood: 1                                                          | Soil: 105, concrete: 12, stone: 1, slatted metal: 1, slatted wood: 2, slatted plastic: 0, wood: 2,                                                            | stone: 0.0002, wood: 0.015, all others: > 0.22 |
| Availability of straw bedding                                                 | Yes: 268, no: 60                                                                                                                                            | Yes: 76, no: 41                                                                                                                                               | 0.0002                                         |
| Annual frequency of removal / clean-up of the straw bedding                   | $\bar{X}$ : 3 ± 0.5 occasions                                                                                                                               | $\bar{X}$ : 5 ± 0.5 occasions                                                                                                                                 | 0.003                                          |
| Availability of ventilators                                                   | Yes: 47, no: 281                                                                                                                                            | Yes: 8, no: 109                                                                                                                                               | 0.035                                          |
| Availability of artificial lighting                                           | Yes: 278, no: 40                                                                                                                                            | Yes: 83, no: 34                                                                                                                                               | < 0.0001                                       |
| <b>Building for lambs / kids</b>                                              |                                                                                                                                                             |                                                                                                                                                               |                                                |
| Availability of milk replacer facilities                                      | Yes: 22, no: 303                                                                                                                                            | Yes: 1, no: 118                                                                                                                                               | 0.013                                          |
| Availability of milk heating facilities                                       | Yes: 20, no: 2                                                                                                                                              | Yes: 1, no: 0                                                                                                                                                 | 0.75                                           |
| Number of plastic teats available                                             | $\bar{X}$ : 22 ± 2 teats                                                                                                                                    | $\bar{X}$ : 23 teats                                                                                                                                          | 0.97                                           |
| Openings in the walls                                                         | Yes: 28, no: 215                                                                                                                                            | Yes: 1, no: 85                                                                                                                                                | 0.004                                          |
| Opening in the roof                                                           | Yes: 28, no: 215                                                                                                                                            | Yes: 1, no: 85                                                                                                                                                | 0.004                                          |
| Daily frequency of administration of milk replacer to lambs / kids            | $\bar{X}$ : 2 ± 0.1 occasions                                                                                                                               | $\bar{X}$ : 2 occasions                                                                                                                                       | 0.88                                           |
| Grouping of lambs / kids for administration of the milk replacer              | Yes: 19, no: 3                                                                                                                                              | Yes: 1, no: 0                                                                                                                                                 | 0.69                                           |
| Criteria for grouping of lambs / kids for administration of the milk replacer | Age: 19, weight: 10, milk production of dam: 3                                                                                                              | Age: 1, weigh: 1, milk production of dam: 0                                                                                                                   | > 0.55                                         |
| <b>Milking parlour</b>                                                        |                                                                                                                                                             |                                                                                                                                                               |                                                |
| Year of initial establishment                                                 | $\bar{X}$ : year 2010 ± 0.5 year                                                                                                                            | $\bar{X}$ : year 2012 ± 0.5 year                                                                                                                              | 0.030                                          |
| Year of most recent renovation                                                | $\bar{X}$ : year 2014 ± 0.5 year                                                                                                                            | $\bar{X}$ : year 2015 ± 0.5 year                                                                                                                              | 0.42                                           |
| Dimensions of the parlour                                                     | Length: $\bar{X}$ : 9.5 ± 0.2 m<br>Width: $\bar{X}$ : 5.0 ± 0.1 m<br>Height: $\bar{X}$ : 3.7 ± 0.1 m<br>Total volume:<br>$\bar{X}$ : 201 ± 9 m <sup>3</sup> | Length: $\bar{X}$ : 9.9 ± 0.5 m<br>Width: $\bar{X}$ : 4.8 ± 0.2 m<br>Height: $\bar{X}$ : 3.6 ± 0.1 m<br>Total volume:<br>$\bar{X}$ : 197 ± 21 m <sup>3</sup>  | > 0.23                                         |
| Material of the floor                                                         | Concrete: 135, tiles: 51, soil: 39, wood: 19, plastic: 3, stone: 2, tin: 2, canvas: 1, metal: 1, tar: 1                                                     | Concrete: 35, tiles: 9, soil: 14, wood: 8, plastic: 0, stone: 0, tin: 0, canvas: 0, metal: 0, tar: 0                                                          | 0.72                                           |
| Type of milking parlour                                                       | Non-mobile: 216, mobile: 39                                                                                                                                 | Non-mobile: 58, mobile: 6                                                                                                                                     | 0.22                                           |
| Type of milking parlour                                                       | Linear one-sided: 152, linear parallel: 91, circular: 10, fishbone: 1, other: 1                                                                             | Linear one-sided: 41, linear parallel: 21, circular: 4, fishbone: 0, other: 0                                                                                 | 0.85                                           |
| Number of animal positions in the parlour                                     | $\bar{X}$ : 25 ± 1 positions                                                                                                                                | $\bar{X}$ : 25 ± 2 positions                                                                                                                                  | 0.65                                           |
| Number of available milking units                                             | $\bar{X}$ : 15 ± 0.5 units                                                                                                                                  | $\bar{X}$ : 16 ± 1.5 units                                                                                                                                    | 0.42                                           |
| Provision of feed during milking                                              | Yes: 230, no: 25                                                                                                                                            | Yes: 58, no: 8                                                                                                                                                | 0.58                                           |
| Availability of facilities for milk yield measurement                         | Yes: 14, no: 242                                                                                                                                            | Yes: 3, no: 63                                                                                                                                                | 0.76                                           |
| Type of facilities for milk yield measurement                                 | Individual animal level: 13, farm level: 1                                                                                                                  | Individual animal level: 3, farm level: 0                                                                                                                     | 0.63                                           |
| Availability of milk quality indicators                                       | Yes: 0, no: 255                                                                                                                                             | Yes: 0, no: 66                                                                                                                                                | n/a                                            |
| Availability of milk flow indicators                                          | Yes: 3, no: 252                                                                                                                                             | Yes: 1, no: 65                                                                                                                                                | 0.83                                           |
| System pulsation rate                                                         | $\bar{X}$ : 145 ± 1.5 p. min <sup>-1</sup>                                                                                                                  | $\bar{X}$ : 141 ± 2.0 p. min <sup>-1</sup>                                                                                                                    | 0.22                                           |

|                                                                           |                                                                                                      |                                                                                                    |         |
|---------------------------------------------------------------------------|------------------------------------------------------------------------------------------------------|----------------------------------------------------------------------------------------------------|---------|
| System pressure                                                           | $\bar{X}$ : 40 ± 0.5 kPa                                                                             | $\bar{X}$ : 39 ± 0.5 kPa                                                                           | 0.22    |
| Type of flow line                                                         | Low: 177, high: 54, other: 23                                                                        | Low: 40, high: 16, other: 10                                                                       | 0.42    |
| Frequency of check-ups of the system by farmer                            | Daily: 220, weekly: 13, monthly: 6, bi-monthly: 3, quarterly: 2, six-monthly: 2, yearly: 2, never: 7 | Daily: 54, weekly: 3, monthly: 2, bi-monthly: 1, quarterly: 1, six-monthly: 0, yearly: 2, never: 3 | 0.80    |
| Annual frequency of check-ups of the system by technicians                | Once: 123, twice: 54, more than twice: 42                                                            | Once: 24, twice: 15, more than twice: 11                                                           | 0.57    |
| System check-ups performed by technicians                                 | Yes: 219, no: 36                                                                                     | Yes: 50, no: 16                                                                                    | 0.047   |
| Type of system check-ups performed by technicians                         | Full: 214, partial: 5                                                                                | Full: 50, partial: 0                                                                               | 0.28    |
| Water cleaning of parlour after the milking sessions                      | Yes: 243, no: 12                                                                                     | Yes: 64, no: 2                                                                                     | 0.55    |
| Temperature of cleaning water                                             | $\bar{X}$ : 70 ± 0.5 °C                                                                              | $\bar{X}$ : 70 ± 1.0 °C                                                                            | 0.96    |
| Use of detergent for parlour cleaning after the milking session           | Yes: 252, no: 3                                                                                      | Yes: 65, no: 1                                                                                     | 0.83    |
| Criteria for changing teatcups                                            | Time: 254, no. of milkings: 1                                                                        | Time: 66, no. of milkings: 0                                                                       | 0.61    |
| Annual frequency of changing teatcups                                     | Once: 130, less than once: 125                                                                       | Once: 29, less than once: 37                                                                       | 0.31    |
| Availability of a milk tank                                               | Yes: 307, no: 18                                                                                     | Yes: 103, no: 16                                                                                   | 0.006   |
| Availability of a mixer in the milk tank                                  | Yes: 306, no: 1                                                                                      | Yes: 101, no: 2                                                                                    | 0.10    |
| Temperature in the milk tank                                              | $\bar{X}$ : 3.7 ± 0.1 °C                                                                             | $\bar{X}$ : 3.6 ± 0.1 °C                                                                           | 0.70    |
| Frequency of milk collection by or delivery to the dairy processing plant | Daily: 82, every two days: 226, every three days: 17, every four days: 0                             | Daily: 36, every two days: 77, every three days: 4, every four days: 2                             | 0.06    |
| <b>Equipment</b>                                                          |                                                                                                      |                                                                                                    |         |
| Availability of a crate                                                   | Yes: 41, no: 284                                                                                     | Yes: 9, no: 110                                                                                    | 0.14    |
| Availability of scales                                                    | Yes: 222, no: 103                                                                                    | Yes: 76, no: 43                                                                                    | 0.38    |
| Scale type available                                                      | Large: 114, portable: 140                                                                            | Large: 28, portable: 59                                                                            | < 0.015 |
| Availability of a roller crusher                                          | Yes: 163, no: 162                                                                                    | Yes: 40, no: 79                                                                                    | 0.002   |
| Availability of a feed mill                                               | Yes: 134, no: 191                                                                                    | Yes: 34, no: 85                                                                                    | 0.015   |
| Availability of an automated feeding system                               | Yes: 61, no: 264                                                                                     | Yes: 22, no: 97                                                                                    | 0.95    |
| Availability of a silage distributor                                      | Yes: 32, no: 293                                                                                     | Yes: 10, no: 109                                                                                   | 0.65    |
| Availability of a straw cutter                                            | Yes: 41, no: 284                                                                                     | Yes: 12, no: 107                                                                                   | 0.47    |
| Availability of automatic water filling system in troughs                 | Yes: 167, no: 158                                                                                    | Yes: 40, no: 79                                                                                    | 0.0009  |
| Availability of system for waste removal                                  | Yes: 5, no: 320                                                                                      | Yes: 2, no: 117                                                                                    | 0.92    |
| Availability of bathing tank                                              | Yes: 4, no: 321                                                                                      | Yes: 1, no: 118                                                                                    | 0.73    |
| Availability of a generator                                               | Yes: 165, no: 160                                                                                    | Yes: 59, no: 60                                                                                    | 0.82    |
| Availability of a tractor                                                 | Yes: 235, no: 90                                                                                     | Yes: 70, no: 49                                                                                    | 0.007   |
| Availability of a truck                                                   | Yes: 63, no: 262                                                                                     | Yes: 23, no: 96                                                                                    | 0.99    |
| Availability of a pick-up                                                 | Yes: 285, no: 40                                                                                     | Yes: 104, no: 15                                                                                   | 0.93    |
| Use of animal identification                                              | Yes: 322, No: 3                                                                                      | Yes: 117, No: 2                                                                                    | 0.50    |
| Animal identification system used                                         | Ear-tags: 311, intra-ruminal boli: 9, necklace: 2                                                    | Ear-tags: 115, intra-ruminal boli: 2, necklace: 0                                                  | 0.56    |
| Availability of automatic animal identification system                    | Yes: 2, no: 323                                                                                      | Yes: 0, no: 119                                                                                    | 0.39    |
| Availability of animal location identifiers                               | Yes: 1, no: 324                                                                                      | Yes: 0, no: 119                                                                                    | 0.54    |
| Means of feed administration                                              | Automated feeding belt: 7, bulk feeding: 57, troughs: 261                                            | Automated feeding belt: 0, bulk feeding: 13, troughs: 106                                          | 0.06    |
| Total number of feed troughs available                                    | $\bar{X}$ : 28 ± 2 troughs                                                                           | $\bar{X}$ : 26 ± 3 troughs                                                                         | 0.71    |
| Type of feed troughs available                                            | Wood: 101, metal: 193, concrete: 1, plastic: 1                                                       | Wood: 41, metal: 75, concrete: 0, plastic: 2                                                       | > 0.06  |
| Total number of drinking points available                                 | $\bar{X}$ : 10 ± 0.5 points                                                                          | $\bar{X}$ : 9 ± 1.0 points                                                                         | 0.46    |
| Availability of refrigerators                                             | Yes: 216, no: 109                                                                                    | Yes: 69, no: 50                                                                                    | 0.10    |
| Description of available refrigerators                                    | Domestic type: 205, professional type: 21                                                            | Domestic type: 65, professional type: 7                                                            | > 0.18  |
| Recording of environmental conditions                                     | Yes: 61, no: 264                                                                                     | Yes: 16, no: 103                                                                                   | 0.19    |
| Available facilities for recording of environmental conditions            | Thermometres: 61, hygrometres: 32                                                                    | Thermometres: 16, hygrometers: 8                                                                   | > 0.43  |
| Practicing sharing of equipment with other farms                          | Yes: 14, no: 311                                                                                     | Yes: 4, no: 115                                                                                    | 0.65    |

| Land                                                  |                                                                                                                                                                             |                                                                                                                                                                   |                                                      |
|-------------------------------------------------------|-----------------------------------------------------------------------------------------------------------------------------------------------------------------------------|-------------------------------------------------------------------------------------------------------------------------------------------------------------------|------------------------------------------------------|
| Grazing practiced                                     | Yes: 281, no: 44                                                                                                                                                            | Yes: 112, no: 7                                                                                                                                                   | 0.025                                                |
| Total grazing land                                    | $\bar{X}$ : 510 ± 50 acres                                                                                                                                                  | $\bar{X}$ : 1322 ± 390 acres                                                                                                                                      | 0.002                                                |
| Ownership of the grazing land                         | Farmer's: 225, other private: 175, public: 103                                                                                                                              | Farmer's: 86, other private: 55, public: 58                                                                                                                       | public: 0.003, other private: 0.01, farmer's: > 0.20 |
| Private grazing land                                  | $\bar{X}$ : 152 ± 18 acres                                                                                                                                                  | $\bar{X}$ : 343 ± 113 acres                                                                                                                                       | 0.018                                                |
| Irrigation of the private grazing land                | Yes: 123, no: 115                                                                                                                                                           | Yes: 27, no: 65                                                                                                                                                   | 0.0003                                               |
| Grazing of cultivated land                            | Yes: 199, no: 82                                                                                                                                                            | Yes: 73, no: 39                                                                                                                                                   | 0.27                                                 |
| Cultivated grazing land                               | $\bar{X}$ : 127 ± 10 acres                                                                                                                                                  | $\bar{X}$ : 117 ± 13 acres                                                                                                                                        | 0.62                                                 |
| Plant types available in the grazing land             | Oat: 151, clover: 55, ryegrass: 53, barley: 50, vetch: 31, corn: 13, sorghum: 10, alfalfa: 6, rye: 4, olive trees: 3, spurges: 2, poppies: 1, wild grass: 1, wheat: 0       | Oat: 44, clover: 15, ryegrass: 16, barley: 28, vetch: 8, corn: 8, sorghum: 3, alfalfa: 2, rye: 3, olive trees: 0, spurges: 0, poppies: 0, wild grass: 1, wheat: 7 | oat: 0.005, all others: > 0.05                       |
| Use of hydroponic facilities                          | Yes: 2, no: 323                                                                                                                                                             | Yes: 1, no: 118                                                                                                                                                   | 0.80                                                 |
| ANIMALS                                               |                                                                                                                                                                             |                                                                                                                                                                   |                                                      |
| Small ruminants                                       |                                                                                                                                                                             |                                                                                                                                                                   |                                                      |
| No. of female animals                                 | $\bar{X}$ : 325 ± 13 ewes                                                                                                                                                   | $\bar{X}$ : 237 ± 20 does                                                                                                                                         | 0.0006                                               |
| No. of male animals                                   | $\bar{X}$ : 15 ± 0.5 rams                                                                                                                                                   | $\bar{X}$ : 16 ± 1.5 bucks                                                                                                                                        | 0.47                                                 |
| Breed of female animals                               | Assaf: 30, Awassi: 1, Boutsko: 2, Chios: 44, Cross-breds: 43, Friesarta: 12, Friesian: 13, Karagouniko: 5, Kefallinia: 1, Lacaune: 95, 'Local': 55, Mytilini: 18, Sfakia: 6 | Alpine: 9, Crossbreds: 18, Damascus: 18, Kefallinia: 1, Indigenous Greek ( <i>Capra prisca</i> ): 50, Murciano-Granadina: 13, Saanen: 5, Skopelos: 5              | n/a                                                  |
| Breed of male animals                                 | Assaf: 27, Awassi: 1, Boutsko: 1, Chios: 36, Cross-breds: 93, Friesarta: 9, Friesian: 7, Karagouniko: 5, Kefallinia: 0, Lacaune: 67, 'Local': 68, Mytilini: 5, Sfakia: 6    | Alpine: 11, Crossbreds: 33, Damascus: 12, Kefallinia: 1, Indigenous Greek ( <i>Capra prisca</i> ): 48, Murciano-Granadina: 9, Saanen: 2, Sfakia: 1, Skopelos: 2   | n/a                                                  |
| Average age of culling ewes / does                    | $\bar{X}$ : 5.9 ± 0.1 years                                                                                                                                                 | $\bar{X}$ : 6.9 ± 0.1 years                                                                                                                                       | < 0.0001                                             |
| Average age of culling rams / bucks                   | $\bar{X}$ : 4.4 ± 0.2 years                                                                                                                                                 | $\bar{X}$ : 4.9 ± 0.2 years                                                                                                                                       | 0.009                                                |
| Average annual replacement rate of ewes / does        | $\bar{X}$ : 17.0% ± 0.2%                                                                                                                                                    | $\bar{X}$ : 14.5% ± 0.3%                                                                                                                                          | < 0.0001                                             |
| Average annual replacement rate of rams / bucks       | $\bar{X}$ : 22.5% ± 1.0%                                                                                                                                                    | $\bar{X}$ : 20.5% ± 1.0%                                                                                                                                          | 0.009                                                |
| Source of replacement animals                         | Own animals: 165, purchase: 24, both sources: 136                                                                                                                           | Own animals: 77, purchase: 6, both sources: 35                                                                                                                    | 0.026                                                |
| Criteria for selection of own animals as replacements | Dam milk production: 254, milkability: 65, general animal morphology: 54, introduction of new pedigree: 8, dam prolificacy: 2                                               | Dam milk production: 98, milkability: 21, general animal morphology: 27, introduction of new pedigree: 1, dam prolificacy: 1                                      | > 0.14                                               |

|                                                                                                 |                                                                                                                                          |                                                                                                                                         |        |
|-------------------------------------------------------------------------------------------------|------------------------------------------------------------------------------------------------------------------------------------------|-----------------------------------------------------------------------------------------------------------------------------------------|--------|
| Criteria for selection of animals for purchase as replacement                                   | Milk production records: 95, introduction of new pedigree: 46, potential milkability: 34, general animal morphology: 17, animal breed: 1 | Milk production records: 20, introduction of new pedigree: 11, potential milkability: 13, general animal morphology: 7, animal breed: 0 | > 0.08 |
| Purveyors of replacements to be purchased                                                       | Other farms: 155, breeding centres: 5                                                                                                    | Other farms: 41, breeding centres: 0                                                                                                    | 0.25   |
| <b>Other domestic animals in the farm</b>                                                       |                                                                                                                                          |                                                                                                                                         |        |
| Adult cattle                                                                                    | Yes: 8, no: 317                                                                                                                          | Yes: 5, no: 114                                                                                                                         | 0.34   |
| Adult cattle                                                                                    | $\bar{X}$ : 9.5 ± 5.0 animals                                                                                                            | $\bar{X}$ : 36.0 ± 23.0 animals                                                                                                         | 0.18   |
| Calves                                                                                          | Yes: 28, no: 297                                                                                                                         | Yes: 11, no: 108                                                                                                                        | 0.84   |
| Calves                                                                                          | $\bar{X}$ : 27.0 ± 9.5 animals                                                                                                           | $\bar{X}$ : 14.0 ± 6.0 animals                                                                                                          | 0.42   |
| Buffaloes                                                                                       | Yes: 3, no: 322                                                                                                                          | Yes: 1, no: 118                                                                                                                         | 0.93   |
| Buffaloes                                                                                       | $\bar{X}$ : 5.0 ± 3.5 animals                                                                                                            | $\bar{X}$ : 1 animal                                                                                                                    | 0.44   |
| Pigs                                                                                            | Yes: 36, no: 289                                                                                                                         | Yes: 14, no: 105                                                                                                                        | 0.84   |
| Pigs                                                                                            | $\bar{X}$ : 5.0 ± 1.0 animals                                                                                                            | $\bar{X}$ : 7.0 ± 2.0 animals                                                                                                           | 0.18   |
| Rabbits                                                                                         | Yes: 28, no: 297                                                                                                                         | Yes: 11, no: 108                                                                                                                        | 0.84   |
| Rabbits                                                                                         | $\bar{X}$ : 15.0 ± 4.0 animals                                                                                                           | $\bar{X}$ : 28.5 ± 9.0 animals                                                                                                          | 0.62   |
| Poultry                                                                                         | Yes: 174, no: 151                                                                                                                        | Yes: 58, no: 61                                                                                                                         | 0.37   |
| Poultry                                                                                         | $\bar{X}$ : 32.5 ± 2.5 animals                                                                                                           | $\bar{X}$ : 35.0 ± 5.0 animals                                                                                                          | 0.65   |
| Domestic fowl                                                                                   | Yes: 31, no: 294                                                                                                                         | Yes: 7, no: 112                                                                                                                         | 0.22   |
| Domestic fowl                                                                                   | $\bar{X}$ : 55.0 ± 32.0 animals                                                                                                          | $\bar{X}$ : 157.0 ± 141.0 animals                                                                                                       | 0.28   |
| Dogs                                                                                            | Yes: 297, no: 28                                                                                                                         | Yes: 115, no: 4                                                                                                                         | 0.06   |
| Dogs                                                                                            | $\bar{X}$ : 5.0 ± 0.5 animals                                                                                                            | $\bar{X}$ : 7.0 ± 0.5 animals                                                                                                           | 0.001  |
| Sheepdogs                                                                                       | Yes: 255, no: 70                                                                                                                         | Yes: 99, no: 20                                                                                                                         | 0.27   |
| Sheepdogs                                                                                       | $\bar{X}$ : 4.0 ± 0.5 animals                                                                                                            | $\bar{X}$ : 6.0 ± 0.5 animals                                                                                                           | 0.0001 |
| Cats                                                                                            | Yes: 225, no: 100                                                                                                                        | Yes: 80, no: 39                                                                                                                         | 0.67   |
| Cats                                                                                            | $\bar{X}$ : 5.0 ± 0.5 animals                                                                                                            | $\bar{X}$ : 5.0 ± 0.5 animals                                                                                                           | 0.80   |
| Exotic animals                                                                                  | Yes: 0, no: 325                                                                                                                          | Yes: 0, no: 119                                                                                                                         | n/a    |
| Horses                                                                                          | Yes: 52, no: 273                                                                                                                         | Yes: 23, no: 96                                                                                                                         | 0.41   |
| Horses                                                                                          | $\bar{X}$ : 2.0 ± 0.5 animals                                                                                                            | $\bar{X}$ : 2.5 ± 0.5 animals                                                                                                           | 0.21   |
| Donkeys or mules                                                                                | Yes: 8, no: 317                                                                                                                          | Yes: 3, no: 116                                                                                                                         | 0.97   |
| Donkeys or mules                                                                                | $\bar{X}$ : 1.0 ± 0.0 animals                                                                                                            | $\bar{X}$ : 1.0 ± 0.0 animals                                                                                                           | n/a    |
| Other animals                                                                                   | Yes: 0, no: 325                                                                                                                          | Yes: 0, no: 119                                                                                                                         | n/a    |
| <b>Rodents in the farm</b>                                                                      |                                                                                                                                          |                                                                                                                                         |        |
| Visual contacts of the farmer with rodents                                                      | Yes: 198, no: 127                                                                                                                        | Yes: 66, no: 53                                                                                                                         | 0.30   |
| Detection of dead rodents in the farm grounds or within a radius of 500 m of the farm           | Yes: 94, no: 231                                                                                                                         | Yes: 33, no: 86                                                                                                                         | 0.81   |
| Bioindications of rodents in the farm grounds or within a radius of 500 m of the farm           | Yes: 304, no: 21                                                                                                                         | Yes: 110, no: 9                                                                                                                         | 0.68   |
| Description of bioindications of rodents                                                        | Rodent faeces: 261, rodent feed: 164                                                                                                     | Rodent faeces: 94, rodent feed: 53                                                                                                      | > 0.14 |
| Detection of rodents in feed troughs                                                            | Yes: 82, no: 243                                                                                                                         | Yes: 28, no: 91                                                                                                                         | 0.71   |
| Detection of rodents in water pots                                                              | Yes: 80, no: 245                                                                                                                         | Yes: 26, no: 93                                                                                                                         | 0.54   |
| Presence of rodents in fields within a radius of 2 km of the farm                               | Yes: 196, no: 129                                                                                                                        | Yes: 76, no: 43                                                                                                                         | 0.50   |
| Rodents identified within a radius of 2 km of the farm                                          | Mice: 193, rats: 2                                                                                                                       | Mice: 75, rats: 1                                                                                                                       | > 0.92 |
| Administration of rodenticides                                                                  | Yes: 127, no: 198                                                                                                                        | Yes: 50, no: 69                                                                                                                         | 0.58   |
| Annual frequency of administration of rodenticides                                              | $\bar{X}$ : 5.5 ± 0.5 occasions                                                                                                          | $\bar{X}$ : 5.5 ± 1.0 occasions                                                                                                         | 0.95   |
| <b>Wildlife mammals</b>                                                                         |                                                                                                                                          |                                                                                                                                         |        |
| Visual contacts of the farmer with wildlife mammals                                             | Yes: 297, no: 28                                                                                                                         | Yes: 109, no: 10                                                                                                                        | 0.94   |
| Detection of dead wildlife mammals in the farms grounds or within a radius of 500 m of the farm | Yes: 80, no: 245                                                                                                                         | Yes: 33, no: 86                                                                                                                         | 0.50   |
| Detection of traces of wildlife mammals within a radius of 2 km of the farm                     | Yes: 184, no: 141                                                                                                                        | Yes: 68, no: 51                                                                                                                         | 0.92   |



|                                                                                                 |                                                                                                                                                                                                                                                                                                                                                                                                                                                                                                                                                                                                                                                                                                                                                                                                                                                                                                                                                                                                                                                                                                                                                                                                                                                                |                                                                                                                                                                                                                                                                                                                                                                                                                                                                                                                                                                                                                                                                                                                                                                                                                                                                                                                                                                                                                                                                                                                                                                                                                                                   |                                                                                                                                                                                                                     |
|-------------------------------------------------------------------------------------------------|----------------------------------------------------------------------------------------------------------------------------------------------------------------------------------------------------------------------------------------------------------------------------------------------------------------------------------------------------------------------------------------------------------------------------------------------------------------------------------------------------------------------------------------------------------------------------------------------------------------------------------------------------------------------------------------------------------------------------------------------------------------------------------------------------------------------------------------------------------------------------------------------------------------------------------------------------------------------------------------------------------------------------------------------------------------------------------------------------------------------------------------------------------------------------------------------------------------------------------------------------------------|---------------------------------------------------------------------------------------------------------------------------------------------------------------------------------------------------------------------------------------------------------------------------------------------------------------------------------------------------------------------------------------------------------------------------------------------------------------------------------------------------------------------------------------------------------------------------------------------------------------------------------------------------------------------------------------------------------------------------------------------------------------------------------------------------------------------------------------------------------------------------------------------------------------------------------------------------------------------------------------------------------------------------------------------------------------------------------------------------------------------------------------------------------------------------------------------------------------------------------------------------|---------------------------------------------------------------------------------------------------------------------------------------------------------------------------------------------------------------------|
| Detection of faeces of wildlife mammals within a radius of 2 km of the farm                     | Yes: 185, no: 140                                                                                                                                                                                                                                                                                                                                                                                                                                                                                                                                                                                                                                                                                                                                                                                                                                                                                                                                                                                                                                                                                                                                                                                                                                              | Yes: 67, no: 52                                                                                                                                                                                                                                                                                                                                                                                                                                                                                                                                                                                                                                                                                                                                                                                                                                                                                                                                                                                                                                                                                                                                                                                                                                   | 0.91                                                                                                                                                                                                                |
| Detection of damage to cultivations within a radius of 2 km of the farm                         | Yes: 182, no: 143                                                                                                                                                                                                                                                                                                                                                                                                                                                                                                                                                                                                                                                                                                                                                                                                                                                                                                                                                                                                                                                                                                                                                                                                                                              | Yes: 65, no: 54                                                                                                                                                                                                                                                                                                                                                                                                                                                                                                                                                                                                                                                                                                                                                                                                                                                                                                                                                                                                                                                                                                                                                                                                                                   | 0.80                                                                                                                                                                                                                |
| Wildlife mammals identified within a radius of 2 km of the farm                                 | Badger: 31, bear: 19, ferret: 44, fox: 242, hare: 77, jackal: 85, mink: 2, otter: 2, red deer: 8, roe deer: 38, wild-boar: 157, wild rabbit: 6, wolf: 129                                                                                                                                                                                                                                                                                                                                                                                                                                                                                                                                                                                                                                                                                                                                                                                                                                                                                                                                                                                                                                                                                                      | Badger: 13, bear: 11, ferret: 18, fox: 95, hare: 34, jackal: 36, mink: 3, otter: 1, red deer: 4, roe deer: 19, wild-boar: 68, wild rabbit: 5, wolf: 50                                                                                                                                                                                                                                                                                                                                                                                                                                                                                                                                                                                                                                                                                                                                                                                                                                                                                                                                                                                                                                                                                            | > 0.07                                                                                                                                                                                                              |
| Common grazing of sheep / goats with wildlife mammals                                           | Yes: 152, no: 173                                                                                                                                                                                                                                                                                                                                                                                                                                                                                                                                                                                                                                                                                                                                                                                                                                                                                                                                                                                                                                                                                                                                                                                                                                              | Yes: 56, no: 63                                                                                                                                                                                                                                                                                                                                                                                                                                                                                                                                                                                                                                                                                                                                                                                                                                                                                                                                                                                                                                                                                                                                                                                                                                   | 0.96                                                                                                                                                                                                                |
| Species of wildlife mammals identified in common grazing with animals of the farm               | Red deer: 11, roe deer: 25, wildboar: 75                                                                                                                                                                                                                                                                                                                                                                                                                                                                                                                                                                                                                                                                                                                                                                                                                                                                                                                                                                                                                                                                                                                                                                                                                       | Red deer: 5, roe deer: 11, wildboar: 26                                                                                                                                                                                                                                                                                                                                                                                                                                                                                                                                                                                                                                                                                                                                                                                                                                                                                                                                                                                                                                                                                                                                                                                                           | > 0.29                                                                                                                                                                                                              |
| <b>Avian wildlife</b>                                                                           |                                                                                                                                                                                                                                                                                                                                                                                                                                                                                                                                                                                                                                                                                                                                                                                                                                                                                                                                                                                                                                                                                                                                                                                                                                                                |                                                                                                                                                                                                                                                                                                                                                                                                                                                                                                                                                                                                                                                                                                                                                                                                                                                                                                                                                                                                                                                                                                                                                                                                                                                   |                                                                                                                                                                                                                     |
| Visual contacts of the farmer with avian wildlife                                               | Yes: 320, no: 5                                                                                                                                                                                                                                                                                                                                                                                                                                                                                                                                                                                                                                                                                                                                                                                                                                                                                                                                                                                                                                                                                                                                                                                                                                                | Yes: 118, no: 1                                                                                                                                                                                                                                                                                                                                                                                                                                                                                                                                                                                                                                                                                                                                                                                                                                                                                                                                                                                                                                                                                                                                                                                                                                   | 0.57                                                                                                                                                                                                                |
| Recognition of dead avian wildlife in the farms grounds or within a radius of 500 m of the farm | Yes: 86, no: 239                                                                                                                                                                                                                                                                                                                                                                                                                                                                                                                                                                                                                                                                                                                                                                                                                                                                                                                                                                                                                                                                                                                                                                                                                                               | Yes: 36, no: 83                                                                                                                                                                                                                                                                                                                                                                                                                                                                                                                                                                                                                                                                                                                                                                                                                                                                                                                                                                                                                                                                                                                                                                                                                                   | 0.43                                                                                                                                                                                                                |
| Bioindications of avian wildlife in the farms grounds or within a radius of 500 m of the farm   | Yes: 212, no: 113                                                                                                                                                                                                                                                                                                                                                                                                                                                                                                                                                                                                                                                                                                                                                                                                                                                                                                                                                                                                                                                                                                                                                                                                                                              | Yes: 78, no: 41                                                                                                                                                                                                                                                                                                                                                                                                                                                                                                                                                                                                                                                                                                                                                                                                                                                                                                                                                                                                                                                                                                                                                                                                                                   | 0.95                                                                                                                                                                                                                |
| Recognition of avian wildlife in feed troughs                                                   | Yes: 179, no: 146                                                                                                                                                                                                                                                                                                                                                                                                                                                                                                                                                                                                                                                                                                                                                                                                                                                                                                                                                                                                                                                                                                                                                                                                                                              | Yes: 72, no: 47                                                                                                                                                                                                                                                                                                                                                                                                                                                                                                                                                                                                                                                                                                                                                                                                                                                                                                                                                                                                                                                                                                                                                                                                                                   | 0.31                                                                                                                                                                                                                |
| Recognition of avian wildlife in water pots                                                     | Yes: 182, no: 143                                                                                                                                                                                                                                                                                                                                                                                                                                                                                                                                                                                                                                                                                                                                                                                                                                                                                                                                                                                                                                                                                                                                                                                                                                              | Yes: 74, no: 45                                                                                                                                                                                                                                                                                                                                                                                                                                                                                                                                                                                                                                                                                                                                                                                                                                                                                                                                                                                                                                                                                                                                                                                                                                   | 0.24                                                                                                                                                                                                                |
| Presence of nests within the farm buildings                                                     | Yes: 131, no: 194                                                                                                                                                                                                                                                                                                                                                                                                                                                                                                                                                                                                                                                                                                                                                                                                                                                                                                                                                                                                                                                                                                                                                                                                                                              | Yes: 52, no: 67                                                                                                                                                                                                                                                                                                                                                                                                                                                                                                                                                                                                                                                                                                                                                                                                                                                                                                                                                                                                                                                                                                                                                                                                                                   | 0.52                                                                                                                                                                                                                |
| Presence of eggs in such nests                                                                  | Yes: 128, no: 197                                                                                                                                                                                                                                                                                                                                                                                                                                                                                                                                                                                                                                                                                                                                                                                                                                                                                                                                                                                                                                                                                                                                                                                                                                              | Yes: 50, no: 69                                                                                                                                                                                                                                                                                                                                                                                                                                                                                                                                                                                                                                                                                                                                                                                                                                                                                                                                                                                                                                                                                                                                                                                                                                   | 0.62                                                                                                                                                                                                                |
| Presence of chicks in such nests                                                                | Yes: 128, no: 197                                                                                                                                                                                                                                                                                                                                                                                                                                                                                                                                                                                                                                                                                                                                                                                                                                                                                                                                                                                                                                                                                                                                                                                                                                              | Yes: 50, no: 69                                                                                                                                                                                                                                                                                                                                                                                                                                                                                                                                                                                                                                                                                                                                                                                                                                                                                                                                                                                                                                                                                                                                                                                                                                   | 0.62                                                                                                                                                                                                                |
| Avian wildlife identified                                                                       | <i>Accipiter brevipes</i> : 10, <i>Anas platyrhynchos</i> : 18, <i>Anser</i> spp.: 2, <i>Aquila chrysaetos</i> ^ <i>Aquila nipalensis</i> ^ <i>Aquila fasciata</i> : 67, <i>Ardeidae</i> family: 3, <i>Athene noctua</i> : 5, <i>Bubo bubo</i> : 5, <i>Carduelis carduelis</i> : 2, <i>Ciconia ciconia</i> : 9, <i>Columba livia</i> : 146, <i>Columba palumbus</i> : 4, <i>Corvus corax</i> : 79, <i>Corvus cornix</i> : 10, <i>Coturnix coturnix</i> : 8, <i>Cuculus canorus</i> : 1, <i>Cygnus cygnus</i> : 2, <i>Erithacus rubecula</i> : 1, <i>Falco</i> spp.: 149, <i>Fringillia coelebs</i> : 3, <i>Galerida cristata</i> : 2, <i>Garrulus glandarius</i> : 26, <i>Gypaetus barbatus</i> : 3, <i>Gyps</i> spp.: 12, <i>Hirundo rustica</i> : 179, <i>Laridae</i> family: 11, <i>Luscinia megarhynchos</i> : 1, <i>Passeridae</i> family: 143, <i>Pelecanus onocrotalus</i> : 2, <i>Perdix perdix</i> : 20, <i>Phasianus colchicus</i> : 4, <i>Phoenicopterus roseus</i> : 1, <i>Pica pica</i> : 266, <i>Pyrhacorax graculus</i> : 8, <i>Scolopax rusticola</i> : 17, <i>Streptopelia decaocto</i> : 227, <i>Streptopelia turtur</i> : 18, <i>Sturnus vulgaris</i> : 2, <i>Turdus merula</i> : 39, <i>Turdus philomelos</i> : 21, <i>Upupa epops</i> : 4 | <i>Accipiter brevipes</i> : 2, <i>Anas platyrhynchos</i> : 1, <i>Anser</i> spp.: 0, <i>Aquila chrysaetos</i> ^ <i>Aquila nipalensis</i> ^ <i>Aquila fasciata</i> : 30, <i>Ardeidae</i> family: 1, <i>Athene noctua</i> : 4, <i>Bubo bubo</i> : 2, <i>Carduelis carduelis</i> : 1, <i>Ciconia ciconia</i> : 1, <i>Columba livia</i> : 50, <i>Columba palumbus</i> : 3, <i>Corvus corax</i> : 46, <i>Corvus cornix</i> : 3, <i>Coturnix coturnix</i> : 5, <i>Cuculus canorus</i> : 0, <i>Cygnus cygnus</i> : 0, <i>Erithacus rubecula</i> : 1, <i>Falco</i> spp.: 55, <i>Fringillia coelebs</i> : 0, <i>Galerida cristata</i> : 0, <i>Garrulus glandarius</i> : 12, <i>Gypaetus barbatus</i> : 3, <i>Gyps</i> spp.: 5, <i>Hirundo rustica</i> : 59, <i>Laridae</i> family: 2, <i>Luscinia megarhynchos</i> : 0, <i>Passeridae</i> family: 45, <i>Pelecanus onocrotalus</i> : 0, <i>Perdix perdix</i> : 15, <i>Phasianus colchicus</i> : 3, <i>Phoenicopterus roseus</i> : 0, <i>Pica pica</i> : 99, <i>Pyrhacorax graculus</i> : 4, <i>Scolopax rusticola</i> : 6, <i>Streptopelia decaocto</i> : 82, <i>Streptopelia turtur</i> : 7, <i>Sturnus vulgaris</i> : 1, <i>Turdus merula</i> : 16, <i>Turdus philomelos</i> : 11, <i>Upupa epops</i> : 0 | <i>Corvus cornix</i> : 0.002, <i>Perdix perdix</i> : 0.013, <i>Hirundo rustica</i> : 0.022, <i>Anas platyrhynchos</i> : 0.027, <i>Ciconia ciconia</i> : 0.028, <i>Gypaetus barbatus</i> : 0.034, all others: > 0.08 |



| Hunting                                                                                           |                                                                                                                                                                                                                                                                                                      |                                                                                                                                                                                                                                                                                                    |                                      |
|---------------------------------------------------------------------------------------------------|------------------------------------------------------------------------------------------------------------------------------------------------------------------------------------------------------------------------------------------------------------------------------------------------------|----------------------------------------------------------------------------------------------------------------------------------------------------------------------------------------------------------------------------------------------------------------------------------------------------|--------------------------------------|
| Presence of hunters in the area around the farm within a radius of 2 km of the farm               | Yes: 284, no: 41                                                                                                                                                                                                                                                                                     | Yes: 113, no: 6                                                                                                                                                                                                                                                                                    | 0.022                                |
| Weekly frequency of the presence of hunters in the area                                           | 3-weekly (2-weekly – 7-weekly) <sup>6</sup>                                                                                                                                                                                                                                                          | 3-weekly (2-weekly – 7-weekly)                                                                                                                                                                                                                                                                     | 0.35                                 |
| Description of hunted avian species                                                               | <i>Scolopax rusticola</i> : 226, <i>Turdus philomelos</i> : 222, <i>Anas platyrhynchos</i> : 65, <i>Coturnix coturnix</i> : 9, <i>Perdix perdix</i> : 8, <i>Turdus merula</i> : 5, <i>Phasianus colchicus</i> : 1, <i>Columba palumbus</i> : 1, Passeridae family: 1, <i>Streptopelia turtur</i> : 3 | <i>Scolopax rusticola</i> : 89, <i>Turdus philomelos</i> : 88, <i>Anas platyrhynchos</i> : 20, <i>Coturnix coturnix</i> : 3, <i>Perdix perdix</i> : 4, <i>Turdus merula</i> : 0, <i>Phasianus colchicus</i> : 0, <i>Columba palumbus</i> : 1, Passeridae family: 0, <i>Streptopelia turtur</i> : 0 | > 0.13                               |
| Description of hunted mammalian species                                                           | Hare: 217, wildboar: 192                                                                                                                                                                                                                                                                             | Hare: 95, wildboar: 78                                                                                                                                                                                                                                                                             | Hare: 0.047, wildboar: 0.39          |
| Distance from the farm that hunting activity occurs                                               | $\bar{X}$ : 1.8 ± 0.2 km                                                                                                                                                                                                                                                                             | $\bar{X}$ : 1.2 ± 0.2 km                                                                                                                                                                                                                                                                           | 0.043                                |
| Months every year during which hunting activity occurs                                            | $\bar{X}$ : 4.5 ± 0.1 months                                                                                                                                                                                                                                                                         | $\bar{X}$ : 4.5 ± 0.1 months                                                                                                                                                                                                                                                                       | 0.50                                 |
| Hunting activity of the farmer                                                                    | Yes: 52, no: 273                                                                                                                                                                                                                                                                                     | Yes: 14, no: 105                                                                                                                                                                                                                                                                                   | 0.27                                 |
| Length of hunting activity of the farmer                                                          | $\bar{X}$ : 20 ± 1 years                                                                                                                                                                                                                                                                             | $\bar{X}$ : 18 ± 2 years                                                                                                                                                                                                                                                                           | 0.55                                 |
| PRODUCTION CHARACTERISTICS                                                                        |                                                                                                                                                                                                                                                                                                      |                                                                                                                                                                                                                                                                                                    |                                      |
| Month of the start of the lambing / kidding season                                                | October<br>(January – December)                                                                                                                                                                                                                                                                      | October<br>(January – December)                                                                                                                                                                                                                                                                    | 0.11                                 |
| Usual month of the start of the milking period                                                    | October<br>(January – December)                                                                                                                                                                                                                                                                      | November<br>(January – December)                                                                                                                                                                                                                                                                   | 0.08                                 |
| Usual month of the end of the milking period                                                      | July<br>(January – December)                                                                                                                                                                                                                                                                         | August<br>(March – December)                                                                                                                                                                                                                                                                       | 0.06                                 |
| Annual milk quantity per animal obtained during the preceding milking period                      | $\bar{X}$ : 207 ± 5 L                                                                                                                                                                                                                                                                                | $\bar{X}$ : 201 ± 10 L                                                                                                                                                                                                                                                                             | 0.55                                 |
| Total number of lambs / kids born per female animal during the preceding lambing / kidding season | $\bar{X}$ : 1.33 ± 0.1 lambs                                                                                                                                                                                                                                                                         | $\bar{X}$ : 1.30 ± 0.2 kids                                                                                                                                                                                                                                                                        | 0.15                                 |
| Total number of lambs / kids sold per female animal during the preceding season                   | $\bar{X}$ : 0.72 ± 0.2 lambs                                                                                                                                                                                                                                                                         | $\bar{X}$ : 0.70 ± 0.8 kids                                                                                                                                                                                                                                                                        | 0.68                                 |
| Average age of lambs / kids at slaughter                                                          | $\bar{X}$ : 50 ± 1 days                                                                                                                                                                                                                                                                              | $\bar{X}$ : 65 ± 3 days                                                                                                                                                                                                                                                                            | < 0.0001                             |
| Average live bodyweight of lambs / kids at slaughter                                              | $\bar{X}$ : 17.5 ± 0.2 kg                                                                                                                                                                                                                                                                            | $\bar{X}$ : 16.6 ± 0.4 kg                                                                                                                                                                                                                                                                          | 0.043                                |
| Average carcass weight of these at slaughter                                                      | $\bar{X}$ : 10.0 ± 0.1 kg                                                                                                                                                                                                                                                                            | $\bar{X}$ : 9.4 ± 0.2 kg                                                                                                                                                                                                                                                                           | 0.012                                |
| Record keeping                                                                                    | Yes: 213, no: 112                                                                                                                                                                                                                                                                                    | Yes: 74, no: 45                                                                                                                                                                                                                                                                                    | 0.51                                 |
| Local manufacturing of dairy products                                                             | Yes: 201, no: 124                                                                                                                                                                                                                                                                                    | Yes: 92, no: 27                                                                                                                                                                                                                                                                                    | 0.002                                |
| Objective of local manufacturing of dairy products                                                | Home consumption: 188, sale: 16                                                                                                                                                                                                                                                                      | Home consumption: 80, sale: 13                                                                                                                                                                                                                                                                     | Home consumption: 0.031, sale: 0.05  |
| Types of dairy products in local production                                                       | Cheese: 186, yoghurt: 81, tarhana: 8, sour milk: 6, ice-cream: 5, cream: 2, pasta: 2, butter: 1, milk-rice pudding: 1                                                                                                                                                                                | Cheese: 88, yoghurt: 29, tarhana: 1, sour milk: 2, ice-cream: 5, cream: 1, pasta: 2, butter: 3, milk-rice pudding: 1                                                                                                                                                                               | Butter: < 0.0001, all others: > 0.06 |

## HEALTH MANAGEMENT

### Health parametres

The two health problems in lambs / kids considered to be of the higher importance

|                                                                                                                                                                                                                                                                                                                                                     |                                                                                                                                                                                                                                                                                                                                                   |                                                                                                             |
|-----------------------------------------------------------------------------------------------------------------------------------------------------------------------------------------------------------------------------------------------------------------------------------------------------------------------------------------------------|---------------------------------------------------------------------------------------------------------------------------------------------------------------------------------------------------------------------------------------------------------------------------------------------------------------------------------------------------|-------------------------------------------------------------------------------------------------------------|
| Abscesses: 2, acidosis: 1, arthritis - encephalitis: 2, brucellosis: 0, clostridial infection: 24, coliform infections: 12, contagious ecthyma: 25, diarrhoea: 233, endoparasitic infections: 8, injuries: 2, <i>Listeria</i> infections: 1, navel infection: 1, paratuberculosis: 1, pica: 1, pneumonia: 89, selenium deficiency: 10, toxicosis: 1 | Abscesses: 1, acidosis: 0, arthritis - encephalitis: 1, brucellosis: 1, clostridial infection: 12, coliform infections: 11, contagious ecthyma: 4, diarrhoea: 83, endoparasitic infections: 11, injuries: 0, <i>Listeria</i> infections: 0, navel infection: 0, paratuberculosis: 1, pica: 0, pneumonia: 27, selenium deficiency: 1, toxicosis: 1 | endoparasitic infections: 0.0009, selenium deficiency: 0.008, contagious ecthyma: 0.034, all others: > 0.15 |
|-----------------------------------------------------------------------------------------------------------------------------------------------------------------------------------------------------------------------------------------------------------------------------------------------------------------------------------------------------|---------------------------------------------------------------------------------------------------------------------------------------------------------------------------------------------------------------------------------------------------------------------------------------------------------------------------------------------------|-------------------------------------------------------------------------------------------------------------|

Total cases of these two health problems in lambs / kids during the preceding season

|                            |                          |      |
|----------------------------|--------------------------|------|
| $\bar{X}$ : 56 ± 5.5 cases | $\bar{X}$ : 45 ± 7 cases | 0.26 |
|----------------------------|--------------------------|------|

Incidence rate of these two health problems in lambs / kids during the preceding season

|                                    |                       |       |
|------------------------------------|-----------------------|-------|
| 13.0% (12.3% - 13.6%) <sup>7</sup> | 14.6% (13.7% - 15.6%) | 0.043 |
|------------------------------------|-----------------------|-------|

The two health problems in replacement animals considered to be of the higher importance

|                                                                                                                                                                                                                                                                                                                                                                                              |                                                                                                                                                                                                                                                                                                                                                                                         |                                                                                              |
|----------------------------------------------------------------------------------------------------------------------------------------------------------------------------------------------------------------------------------------------------------------------------------------------------------------------------------------------------------------------------------------------|-----------------------------------------------------------------------------------------------------------------------------------------------------------------------------------------------------------------------------------------------------------------------------------------------------------------------------------------------------------------------------------------|----------------------------------------------------------------------------------------------|
| Abortion: 12, acidosis: 2, brucellosis: 1, caseous lymphadenitis: 3, cerebral coenurosis: 44, clostridial infections: 34, contagious agalactia: 3, contagious ecthyma: 1, diarrhoea: 27, endoparasitic infections: 7, enzootic intranasal tumour: 1, lameness: 4, <i>Listeria</i> infections: 1, mastitis: 12, paratuberculosis: 9, pneumonia: 53, pregnancy toxemia: 1, vaginal prolapse: 2 | Abortion: 7, acidosis: 3, brucellosis: 0, caseous lymphadenitis: 3, cerebral coenurosis: 7, clostridial infections: 7, contagious agalactia: 1, contagious ecthyma: 1, diarrhoea: 8, endoparasitic infections: 1, enzootic intranasal tumour: 2, lameness: 2, <i>Listeria</i> infections: 0, mastitis: 6, paratuberculosis: 7, pneumonia: 13, pregnancy toxemia: 0, vaginal prolapse: 0 | acidosis: 0.002, cerebral coenurosis: 0.013, caseous lymphadenitis: 0.033, all others > 0.05 |
|----------------------------------------------------------------------------------------------------------------------------------------------------------------------------------------------------------------------------------------------------------------------------------------------------------------------------------------------------------------------------------------------|-----------------------------------------------------------------------------------------------------------------------------------------------------------------------------------------------------------------------------------------------------------------------------------------------------------------------------------------------------------------------------------------|----------------------------------------------------------------------------------------------|

Total cases of these two health problems in replacement animals during the preceding season

|                          |                         |      |
|--------------------------|-------------------------|------|
| $\bar{X}$ : 11 ± 3 cases | $\bar{X}$ : 9 ± 2 cases | 0.68 |
|--------------------------|-------------------------|------|

Incidence rate of these two health problems in replacement animals during the preceding season

|                       |                       |      |
|-----------------------|-----------------------|------|
| 20.0% (15.4% - 24.1%) | 26.5% (22.6% - 28.9%) | 0.48 |
|-----------------------|-----------------------|------|

The two health problems in adult animals considered to be of the higher importance

|                                                                                                                                                                                                                                                                                                                                                                                                                                                                                                                                                                                     |                                                                                                                                                                                                                                                                                                                                                                                                                                                                                                                                                                                |                                                                    |
|-------------------------------------------------------------------------------------------------------------------------------------------------------------------------------------------------------------------------------------------------------------------------------------------------------------------------------------------------------------------------------------------------------------------------------------------------------------------------------------------------------------------------------------------------------------------------------------|--------------------------------------------------------------------------------------------------------------------------------------------------------------------------------------------------------------------------------------------------------------------------------------------------------------------------------------------------------------------------------------------------------------------------------------------------------------------------------------------------------------------------------------------------------------------------------|--------------------------------------------------------------------|
| Abortion: 17, acidosis: 2, brucellosis: 0, cerebral coenurosis: 5, clostridial infections: 17, contagious agalactia: 19, contagious ecthyma: 2, copper toxicosis: 2, diarrhoea: 8, endoparasitic infections: 6, enzootic intranasal tumour: 1, external myositis: 0, hypervitaminosis A: 1, hypocalcaemia: 1, injuries: 0, lameness: 20, Lentivirus infections: 6, <i>Listeria</i> infections: 3, mange: 1, mastitis: 215, <i>Oestrus ovis</i> infestation: 1, paratuberculosis: 9, pneumonia: 57, pregnancy toxemia: 3, scrapie: 10, self-suckling: 0, sudden death: 1, toxicosis: | Abortion: 4, acidosis: 0, brucellosis: 1, cerebral coenurosis: 0, clostridial infections: 9, contagious agalactia: 5, contagious ecthyma: 1, copper toxicosis: 0, diarrhoea: 3, endoparasitic infections: 0, enzootic intranasal tumour: 1, external myositis: 1, hypervitaminosis A: 1, hypocalcaemia: 0, injuries: 1, lameness: 5, Lentivirus infections: 3, <i>Listeria</i> infections: 2, mange: 0, mastitis: 51, <i>Oestrus ovis</i> infestation: 0, paratuberculosis: 23, pneumonia: 17, pregnancy toxemia: 0, scrapie: 0, self-suckling: 1, sudden death: 0, toxicosis: | mastitis: < 0.0001, paratuberculosis: < 0.0001, all others: > 0.05 |
|-------------------------------------------------------------------------------------------------------------------------------------------------------------------------------------------------------------------------------------------------------------------------------------------------------------------------------------------------------------------------------------------------------------------------------------------------------------------------------------------------------------------------------------------------------------------------------------|--------------------------------------------------------------------------------------------------------------------------------------------------------------------------------------------------------------------------------------------------------------------------------------------------------------------------------------------------------------------------------------------------------------------------------------------------------------------------------------------------------------------------------------------------------------------------------|--------------------------------------------------------------------|

|                                                                                             |                                                                                                                                                                                                                                             |                                                                                                                                                                                                                                        |                                                                     |
|---------------------------------------------------------------------------------------------|---------------------------------------------------------------------------------------------------------------------------------------------------------------------------------------------------------------------------------------------|----------------------------------------------------------------------------------------------------------------------------------------------------------------------------------------------------------------------------------------|---------------------------------------------------------------------|
|                                                                                             | 5, udder oedema: 1, wasting disease: 2                                                                                                                                                                                                      | 3, udder oedema: 0, wasting disease: 0                                                                                                                                                                                                 |                                                                     |
| Total cases of these two health problems in adult animals during the preceding season       | $\bar{X}$ : 26 ± 3.5 cases                                                                                                                                                                                                                  | $\bar{X}$ : 15 ± 2.5 cases                                                                                                                                                                                                             | 0.07                                                                |
| Incidence rate of these two health problems in adult animals during the preceding season    | 8.0% (7.2% - 8.7%)                                                                                                                                                                                                                          | 6.3% (5.8% - 6.8%)                                                                                                                                                                                                                     | 0.004                                                               |
| Total deaths, of any cause, in adult animals during the preceding season                    | $\bar{X}$ : 17 ± 1.5 cases                                                                                                                                                                                                                  | $\bar{X}$ : 14 ± 1 cases                                                                                                                                                                                                               | 0.18                                                                |
| Incidence rate of total deaths, of any cause, in adult animals during the pre-ceding season | 5.2% (5.0% - 5.5%)                                                                                                                                                                                                                          | 5.9% (5.8% - 6.0%)                                                                                                                                                                                                                     | 0.023                                                               |
| Collaboration with a veterinarian                                                           | Yes: 283, no: 42                                                                                                                                                                                                                            | Yes: 101, no: 18                                                                                                                                                                                                                       | 0.55                                                                |
| Means of calculating live bodyweight for the administration of pharmaceutical products      | Estimation: 252, weighing: 73                                                                                                                                                                                                               | Estimation: 93, weighing: 26                                                                                                                                                                                                           | 0.96                                                                |
| Routine overdosing (compared to dose prescribed) of pharmaceuticals                         | Yes: 61, no: 264                                                                                                                                                                                                                            | Yes: 26, no: 93                                                                                                                                                                                                                        | 0.47                                                                |
| Use of laboratory diagnostic examinations                                                   | Yes: 133, no: 192                                                                                                                                                                                                                           | Yes: 52, no: 67                                                                                                                                                                                                                        | 0.60                                                                |
| In samples of milk                                                                          | Yes: 70, no: 63                                                                                                                                                                                                                             | Yes: 25, no: 27                                                                                                                                                                                                                        | 0.58                                                                |
| In samples of blood                                                                         | Yes: 99, no: 34                                                                                                                                                                                                                             | Yes: 39, no: 13                                                                                                                                                                                                                        | 0.94                                                                |
| In samples of faeces                                                                        | Yes: 35, no: 98                                                                                                                                                                                                                             | Yes: 16, no: 36                                                                                                                                                                                                                        | 0.54                                                                |
| Total visits made annually by veterinarians to the farm during the preceding season         | $\bar{X}$ : 7 ± 0.5 occasions                                                                                                                                                                                                               | $\bar{X}$ : 7 ± 0.5 occasions                                                                                                                                                                                                          | 0.86                                                                |
| Reasons for the visits of the veterinarians                                                 | Administration of pharmaceutical treatments: 115, feedstuff evaluation: 6, overall appraisal of flock: 163, pregnancy diagnosis: 42, vaccinations: 229                                                                                      | Administration of pharmaceutical treatments: 42, feedstuff evaluation: 2, overall appraisal of herd: 61, pregnancy diagnosis: 8, vaccinations: 90                                                                                      | vaccinations: 0.030, pregnancy diagnosis: 0.038, all others: > 0.30 |
| Maintenance of prescribed withdrawal periods after administration of pharmaceuticals        | Yes: 321, no: 4                                                                                                                                                                                                                             | Yes: 117, no: 2                                                                                                                                                                                                                        | 0.72                                                                |
| Evaluation of ammonia concentration within the buildings                                    | Yes: 4, no: 321                                                                                                                                                                                                                             | Yes: 1, no: 118                                                                                                                                                                                                                        | 0.73                                                                |
| Animal deaths from attacks by other animals                                                 | Yes: 118, no: 207                                                                                                                                                                                                                           | Yes: 70, no: 49                                                                                                                                                                                                                        | < 0.0001                                                            |
| Overall frequency of animal deaths by other animals during the preceding season             | Monthly (Monthly – Less frequently than yearly)                                                                                                                                                                                             | Monthly (Monthly – Less frequently than yearly)                                                                                                                                                                                        | 0.54                                                                |
| Species of animals that caused animal deaths during the preceding season                    | Bears: 6, crows: 1, eagles: 1, farm dogs: 23, ferrets: 1, foxes: 8, jackals: 21, wild cats: 1, wolves: 64                                                                                                                                   | Bears: 3, crows: 1, eagles: 1, farm dogs: 3, ferrets: 0, foxes: 3, jackals: 20, wild cats: 2, wolves: 43                                                                                                                               | farm dogs: 0.008, jackals: 0.042, all others: > 0.15                |
| Animal deaths from natural disasters                                                        | Yes: 32, no: 293                                                                                                                                                                                                                            | Yes: 2, no: 97                                                                                                                                                                                                                         | 0.014                                                               |
| <b>Diseases of adult animals – mastitis</b>                                                 |                                                                                                                                                                                                                                             |                                                                                                                                                                                                                                        |                                                                     |
| Overall incidence rate during the preceding season                                          | 3.9% (3.8% - 4.0%)                                                                                                                                                                                                                          | 2.8% (2.6% - 3.0%)                                                                                                                                                                                                                     | < 0.0001                                                            |
| Sample collection and testing for diagnostic purposes                                       | Yes: 103, no: 169                                                                                                                                                                                                                           | Yes: 35, no: 36                                                                                                                                                                                                                        | 0.08                                                                |
| Treatment                                                                                   | Yes: 270, no: 2                                                                                                                                                                                                                             | Yes: 71, no: 0                                                                                                                                                                                                                         | 0.47                                                                |
| Antibiotics used for treatment                                                              | Amoxicillin: 11, ampicillin: 1, cephalosporins: 10, cloxacillin: 4, enrofloxacin: 7, florfenicol: 2, gentamicin: 4, lincomycin: 7, marbofloxacin: 6, oxytetracycline: 60, penicillin: 218, spectinomycin: 4, streptomycin: 200, tylosin: 11 | Amoxicillin: 3, ampicillin: 1, cephalosporins: 1, cloxacillin: 3, enrofloxacin: 3, florfenicol: 0, gentamicin: 0, lincomycin: 3, marbofloxacin: 0, oxytetracycline: 20, penicillin: 53, spectinomycin: 2, streptomycin: 50, tylosin: 4 | cloxacillin: 0.019, all others: > 0.11                              |

|                                                         |                                                                                                                                                                                                                                                                                                                                          |                                                                                                                                                                                                                                                                                                                                      |                                                                                                                                  |
|---------------------------------------------------------|------------------------------------------------------------------------------------------------------------------------------------------------------------------------------------------------------------------------------------------------------------------------------------------------------------------------------------------|--------------------------------------------------------------------------------------------------------------------------------------------------------------------------------------------------------------------------------------------------------------------------------------------------------------------------------------|----------------------------------------------------------------------------------------------------------------------------------|
| Route for administration of antimicrobials              | Systemic: 240, intra-mammary: 19, systemic & intramammary: 11                                                                                                                                                                                                                                                                            | Systemic: 63, intra-mammary: 8, systemic & intramammary: 0                                                                                                                                                                                                                                                                           | 0.12                                                                                                                             |
| <b>Diseases of adult animals – abortion</b>             |                                                                                                                                                                                                                                                                                                                                          |                                                                                                                                                                                                                                                                                                                                      |                                                                                                                                  |
| Overall incidence rate during the preceding season      | 2.0% (1.9% - 2.1%)                                                                                                                                                                                                                                                                                                                       | 2.5% (2.7% - 2.9%)                                                                                                                                                                                                                                                                                                                   | < 0.0001                                                                                                                         |
| Sample collection and testing for diagnostic purposes   | Yes: 40, no: 114                                                                                                                                                                                                                                                                                                                         | Yes: 20, no: 37                                                                                                                                                                                                                                                                                                                      | 0.19                                                                                                                             |
| Types of samples collected for testing                  | Blood: 30, abortive material: 15, milk: 4                                                                                                                                                                                                                                                                                                | Blood: 15, abortive material: 5, milk: 2                                                                                                                                                                                                                                                                                             | > 0.25                                                                                                                           |
| Antibiotics used for treatment                          | Cephalosporins: 1, lincomycin: 1, oxytetracycline: 61, penicillin: 9, streptomycin: 3, tylosin: 1                                                                                                                                                                                                                                        | Cephalosporins: 1, lincomycin: 1, oxytetracycline: 37, penicillin: 2, streptomycin: 0, tylosin: 0                                                                                                                                                                                                                                    | penicillin: 0.011, all others: > 0.12                                                                                            |
| Collection of aborted material for safe disposal        | Yes: 41, no: 113                                                                                                                                                                                                                                                                                                                         | Yes: 21, no: 36                                                                                                                                                                                                                                                                                                                      | 0.15                                                                                                                             |
| <b>Diseases of adult animals – pregnancy toxemia</b>    |                                                                                                                                                                                                                                                                                                                                          |                                                                                                                                                                                                                                                                                                                                      |                                                                                                                                  |
| Overall incidence rate during the preceding season      | 0.5% (0.4% - 0.6%)                                                                                                                                                                                                                                                                                                                       | 0.2% (0.1% - 0.3%)                                                                                                                                                                                                                                                                                                                   | < 0.0001                                                                                                                         |
| Treatment performed                                     | Penicillin: 3, streptomycin: 3, ciprofloxacin: 1, dextrose: 13, oxytetracycline: 1, dexamethasone: 1, calcium: 32, propylene glycol: 11, vitamins: 12, molasses: 3, selenium: 1, trace minerals: 2, sodium: 2, nutritional change: 1                                                                                                     | Penicillin: 0, streptomycin: 0, ciprofloxacin: 0, dextrose: 0, oxytetracycline: 1, dexamethasone: 0, calcium: 5, propylene glycol: 2, vitamins: 1, molasses: 0, selenium: 0, trace minerals: 0, sodium: 0, nutritional change: 0                                                                                                     | dextrose: 0.024, all others: > 0.07                                                                                              |
| <b>Diseases of adult animals – lameness</b>             |                                                                                                                                                                                                                                                                                                                                          |                                                                                                                                                                                                                                                                                                                                      |                                                                                                                                  |
| Overall incidence rate during the preceding season      | 2.8% (2.7% - 2.9%)                                                                                                                                                                                                                                                                                                                       | 1.2% (1.1% - 1.4%)                                                                                                                                                                                                                                                                                                                   | < 0.0001                                                                                                                         |
| Treatment performed                                     | Lincomycin: 57, oxytetracycline: 24, cephalosporins: 16, tylosin: 4, penicillin: 2, streptomycin: 0, spectinomycin: 2, prednisolone: 0, dexamethasone: 1, quinolones: 1, non-steroidal anti-inflammatory drugs: 1, alamyacin: 1, footbathing in copper / zinc solution: 33, foot pairing: 10, diesel bathing: 3, acid-based solutions: 1 | Lincomycin: 12, oxytetracycline: 8, cephalosporins: 4, tylosin: 0, penicillin: 1, streptomycin: 1, spectinomycin: 0, prednisolone: 1, dexamethasone: 0, quinolones: 0, non-steroidal anti-inflammatory drugs: 0, alamyacin: 0, footbathing in copper / zinc solution: 3, foot pairing: 0, diesel bathing: 0, acid-based solutions: 0 | lincomycin: 0.0001, foot pairing: 0.001, footbathing in copper / zinc solution: 0.030, oxytetracycline: 0.048, all others > 0.12 |
| <b>Diseases of adult animals – mange</b>                |                                                                                                                                                                                                                                                                                                                                          |                                                                                                                                                                                                                                                                                                                                      |                                                                                                                                  |
| Overall incidence rate during the preceding season      | 1.4% (1.3% - 1.5%)                                                                                                                                                                                                                                                                                                                       | 0.1% (0.1% - 0.1%)                                                                                                                                                                                                                                                                                                                   | < 0.0001                                                                                                                         |
| Treatment performed                                     | Ivermectin: 24, eprinomectin: 8, spectinomycin: 1, moxidectin: 3, various lay 'medications': 3                                                                                                                                                                                                                                           | Ivermectin: 8, eprinomectin: 2, spectinomycin: 0, moxidectin: 0, various lay 'medications': 0                                                                                                                                                                                                                                        | > 0.12                                                                                                                           |
| <b>Diseases of adult animals – obstetrical cases</b>    |                                                                                                                                                                                                                                                                                                                                          |                                                                                                                                                                                                                                                                                                                                      |                                                                                                                                  |
| Overall incidence rate during the preceding season      | 1.0% (0.9% - 1.1%)                                                                                                                                                                                                                                                                                                                       | 0.6% (0.7% - 0.8%)                                                                                                                                                                                                                                                                                                                   | < 0.0001                                                                                                                         |
| Call for veterinary support                             | Yes: 69, no: 67                                                                                                                                                                                                                                                                                                                          | Yes: 24, no: 12                                                                                                                                                                                                                                                                                                                      | 0.09                                                                                                                             |
| Person who performed manipulations                      | Veterinarian: 68, farmer: 97, non-veterinary staff: 3                                                                                                                                                                                                                                                                                    | Veterinarian: 22, farmer: 25, non-veterinary staff: 0                                                                                                                                                                                                                                                                                | > 0.11                                                                                                                           |
| <b>Diseases of young animals – respiratory problems</b> |                                                                                                                                                                                                                                                                                                                                          |                                                                                                                                                                                                                                                                                                                                      |                                                                                                                                  |
| Overall incidence rate during the preceding season      | 1.4% (1.3% - 1.5%)                                                                                                                                                                                                                                                                                                                       | 1.1% (1.0% - 1.2%)                                                                                                                                                                                                                                                                                                                   | < 0.0001                                                                                                                         |
| Treatment performed                                     | Yes: 71, no: 25                                                                                                                                                                                                                                                                                                                          | Yes: 17, no: 4                                                                                                                                                                                                                                                                                                                       | 0.99                                                                                                                             |

|                                                                       |                                                                                                                                                                                                                                                         |                                                                                                                                                                                                                                                       |                                         |
|-----------------------------------------------------------------------|---------------------------------------------------------------------------------------------------------------------------------------------------------------------------------------------------------------------------------------------------------|-------------------------------------------------------------------------------------------------------------------------------------------------------------------------------------------------------------------------------------------------------|-----------------------------------------|
| Antibiotics used for treatment                                        | Amoxicillin: 2, ampicillin: 3, cephalosporins: 3, enrofloxacin: 7, erythromycin: 1, gentamicin: 1, lincomycin: 2, marbofloxacin: 1, oxytetracycline: 40, penicillin: 9, spectinomycin: 2, streptomycin: 3, tilmicosin: 1, tulathromycin: 12, tylosin: 8 | Amoxicillin: 0, ampicillin: 2, cephalosporins: 0, enrofloxacin: 2, erythromycin: 0, gentamicin: 0, lincomycin: 0, marbofloxacin: 1, oxytetracycline: 7, penicillin: 3, spectinomycin: 0, streptomycin: 1, tilmicosin: 0, tulathromycin: 5, tylosin: 1 | > 0.09                                  |
| <b>Diseases of young animals – diarrhoea</b>                          |                                                                                                                                                                                                                                                         |                                                                                                                                                                                                                                                       |                                         |
| Overall incidence rate during the preceding season                    | 7.9% (7.8% - 8.0%)                                                                                                                                                                                                                                      | 10.4% (10.0% - 10.7%)                                                                                                                                                                                                                                 | < 0.0001                                |
| Treatment performed                                                   | Yes: 169, no: 25                                                                                                                                                                                                                                        | Yes: 64, no: 5                                                                                                                                                                                                                                        | 0.21                                    |
| Antibiotics used for treatment                                        | Amoxicillin: 35, ampicillin: 4, cephalosporins: 3, cloxacillin: 2, colistin: 1, enrofloxacin: 15, gentamicin: 12, lincomycin: 4, neomycin: 2, oxytetracycline: 46, penicillin: 25, spectinomycin: 13, streptomycin: 17, sulfonamides: 6, tylosin: 13    | Amoxicillin: 13, ampicillin: 0, cephalosporins: 0, cloxacillin: 0, colistin: 1, enrofloxacin: 0, gentamicin: 6, lincomycin: 2, neomycin: 0, oxytetracycline: 19, penicillin: 11, spectinomycin: 5, streptomycin: 5, sulfonamides: 4, tylosin: 1       | enrofloxacin: 0.014, all others: > 0.16 |
| <b>Management practices</b>                                           |                                                                                                                                                                                                                                                         |                                                                                                                                                                                                                                                       |                                         |
| Reproductive management                                               | No hormonal control: 217, administration of melatonin: 23, administration of progestogens: 89                                                                                                                                                           | No hormonal control: 99, administration of melatonin: 5, administration of progestogens: 16                                                                                                                                                           | 0.0007                                  |
| Duration of mating period                                             | 2 (1 – 12) months                                                                                                                                                                                                                                       | 2 (1 – 12) months                                                                                                                                                                                                                                     | 0.09                                    |
| Changes of rams / bucks into the ewes / does during the mating period | Yes: 92, no: 233                                                                                                                                                                                                                                        | Yes: 25, no: 94                                                                                                                                                                                                                                       | 0.12                                    |
| Castration of lambs / kids kept for fattening                         | Yes: 1, no: 324                                                                                                                                                                                                                                         | Yes: 0, no: 119                                                                                                                                                                                                                                       | 0.54                                    |
| Use of vasectomies                                                    | Yes: 0, no: 325                                                                                                                                                                                                                                         | Yes: 0, no: 119                                                                                                                                                                                                                                       | n/a                                     |
| Use of artificial insemination                                        | Yes: 0, no: 325                                                                                                                                                                                                                                         | Yes: 0, no: 119                                                                                                                                                                                                                                       | n/a                                     |
| Use of embryo transfer                                                | Yes: 0, no: 325                                                                                                                                                                                                                                         | Yes: 0, no: 119                                                                                                                                                                                                                                       | n/a                                     |
| Use of ultrasound for pregnancy diagnosis                             | Yes: 119, no: 206                                                                                                                                                                                                                                       | Yes: 20, no: 99                                                                                                                                                                                                                                       | < 0.0001                                |
| Nutritional modifications before the lambing period                   | Yes: 229, no: 96                                                                                                                                                                                                                                        | Yes: 68, no: 51                                                                                                                                                                                                                                       | 0.008                                   |
| Beginning of the mating period for ewes / does                        | May (February–December)                                                                                                                                                                                                                                 | June (January–December)                                                                                                                                                                                                                               | < 0.0001                                |
| Duration of the mating period for ewes / does                         | 2 (1 – 12) months                                                                                                                                                                                                                                       | 2 (1 – 12) months                                                                                                                                                                                                                                     | 0.09                                    |
| Beginning of the mating period for ewe-lambs and doelings             | August (January–December)                                                                                                                                                                                                                               | August (January–December)                                                                                                                                                                                                                             | 0.07                                    |
| Duration of the mating period for ewe-lambs and doelings              | 1 (1 – 9) months                                                                                                                                                                                                                                        | 1 (1 – 6) months                                                                                                                                                                                                                                      | 0.006                                   |
| Grouping of pregnant females during the final stage of pregnancy      | Yes: 214, no: 111                                                                                                                                                                                                                                       | Yes: 69, no: 50                                                                                                                                                                                                                                       | 0.13                                    |
| Induction of lambing                                                  | Yes: 5, no: 320                                                                                                                                                                                                                                         | Yes: 1, no: 118                                                                                                                                                                                                                                       | 0.57                                    |
| Newborn care and specific monitoring                                  | Yes: 293, no: 32                                                                                                                                                                                                                                        | Yes: 109, no: 10                                                                                                                                                                                                                                      | 0.65                                    |
| Maintenance of a colostrum bank                                       | Yes: 46, no: 279                                                                                                                                                                                                                                        | Yes: 12, no: 107                                                                                                                                                                                                                                      | 0.26                                    |
| Lamb / kid fostering to female animals other than their dams          | Yes: 112, no: 213                                                                                                                                                                                                                                       | Yes: 86, no: 33                                                                                                                                                                                                                                       | < 0.0001                                |

|                                                          |                                                                                                                                                                                    |                                                                                                                                                                               |                                                                                                                                                   |
|----------------------------------------------------------|------------------------------------------------------------------------------------------------------------------------------------------------------------------------------------|-------------------------------------------------------------------------------------------------------------------------------------------------------------------------------|---------------------------------------------------------------------------------------------------------------------------------------------------|
|                                                          |                                                                                                                                                                                    |                                                                                                                                                                               | increased number of lambs / kids: < 0.0001, stimulation of milk production in female that aborted: 0.001, death of dam: 0.016, all others: > 0.06 |
| Reasons for doing this practice                          | Death of dam: 39, improving nutrition of lambs: 1, inadequate milk availability by dam: 14, increased number of lambs: 112, stimulation of milk production in ewe that aborted: 31 | Death of dam: 18, improving nutrition of kids: 3, inadequate milk availability by dam: 5, increased number of kids: 54, stimulation of milk production in doe that aborted: 9 |                                                                                                                                                   |
| Administration of a lamb- / kid-specific diet            | Yes: 226, no: 99                                                                                                                                                                   | Yes: 79, no: 40                                                                                                                                                               | 0.52                                                                                                                                              |
| Age for lamb / kid removal from their dams               | X: 50 ± 1 days                                                                                                                                                                     | X: 65 ± 3 days                                                                                                                                                                | < 0.0001                                                                                                                                          |
| Daily number of milking sessions                         | 2 (1 – 3)                                                                                                                                                                          | 2 (1 – 3)                                                                                                                                                                     | 0.0001                                                                                                                                            |
| Method for drying-off at the end of the lactation period | Abrupt: 10, progressive: 315                                                                                                                                                       | Abrupt: 5, progressive: 114                                                                                                                                                   | 0.56                                                                                                                                              |
| Duration of the dry-period                               | X: 3.0 ± 0.1 months                                                                                                                                                                | X: 2.9 ± 0.1 months                                                                                                                                                           | 0.84                                                                                                                                              |
| Seasonal transfer of animals to other site               | Yes: 49, no: 276                                                                                                                                                                   | Yes: 28, no: 91                                                                                                                                                               | 0.037                                                                                                                                             |
| Means of animal transfer between sites                   | Walking: 40, truck: 11                                                                                                                                                             | Walking: 22, truck: 8                                                                                                                                                         | > 0.28                                                                                                                                            |
| Distance between sites                                   | X: 32 ± 3 km                                                                                                                                                                       | X: 32 ± 5 km                                                                                                                                                                  | 0.99                                                                                                                                              |
| Nights out during transfer between sites                 | X: 1.8 ± 0.1 overnights                                                                                                                                                            | X: 1.8 ± 0.1 overnights                                                                                                                                                       | 0.86                                                                                                                                              |
| Post-mortem examination of animals that die              | Yes: 171, no: 154                                                                                                                                                                  | Yes: 64, no: 55                                                                                                                                                               | 0.83                                                                                                                                              |
| Disposal of carcasses from dead animals                  | Burying: 183, disposal by knackers: 3, drop-off at water streams: 35, drop-off away: 52, feeding to birds: 1, feeding to dogs: 49, incineration: 28, slaughterhouse: 0             | Burying: 53, disposal by knackers: 3, drop-off at water streams: 19, drop-off away: 23, feeding to birds: 0, feeding to dogs: 29, incineration: 10, slaughterhouse: 1         | Feeding to dogs: 0.011, burying: 0.014, all others: > 0.06                                                                                        |
| Reporting to the farming insurance agency                | Yes: 93, no: 232                                                                                                                                                                   | Yes: 37, no: 82                                                                                                                                                               | 0.61                                                                                                                                              |
| Compensation by the farming insurance agency             | Yes: 16, no: 77                                                                                                                                                                    | Yes: 8, no: 29                                                                                                                                                                | 0.56                                                                                                                                              |
| Manure management                                        | Spread to fields: 320, disposal: 5, sale: 1                                                                                                                                        | Spread to fields: 109, disposal: 7, sale: 3                                                                                                                                   | < 0.007                                                                                                                                           |
| Security availability at the farm                        | Yes: 214, no: 111                                                                                                                                                                  | Yes: 65, no: 54                                                                                                                                                               | 0.03                                                                                                                                              |
| Duration of security attendance                          | Continuous: 210, regular visits: 4                                                                                                                                                 | Continuous: 65, regular visits: 0                                                                                                                                             | 0.27                                                                                                                                              |
| Farm security                                            | Alarm: 53, light wire fence: 68, personnel: 5, stoned wall: 1, strong wire fence: 93                                                                                               | Alarm: 13, light wire fence: 28, personnel: 1, stoned wall: 0, strong wire fence: 26                                                                                          | Light wire fence: 0.047, all others: > 0.19                                                                                                       |
| Availability of disinfectant at entrance ditch           | Yes: 1, no: 324                                                                                                                                                                    | Yes: 0, no: 119                                                                                                                                                               | 0.54                                                                                                                                              |
| <b>Vaccinations</b>                                      |                                                                                                                                                                                    |                                                                                                                                                                               |                                                                                                                                                   |
| Against <i>Chlamydia</i> infection                       | Yes: 130, no: 195                                                                                                                                                                  | Yes: 39, no: 80                                                                                                                                                               | 0.16                                                                                                                                              |
| Description of the most common schedule:                 | Use in ewe-lambs: 98                                                                                                                                                               | Use in doelings: 29                                                                                                                                                           | 0.90                                                                                                                                              |
| Against <i>Toxoplasma</i> infection                      | Yes: 0, no: 325                                                                                                                                                                    | Yes: 0, no: 119                                                                                                                                                               | n/a                                                                                                                                               |
| Description of the most common schedule:                 | n/a                                                                                                                                                                                | n/a                                                                                                                                                                           | n/a                                                                                                                                               |
| Against <i>Brucella</i> infection                        | Yes: 301, no: 0                                                                                                                                                                    | Yes: 106, no: 0                                                                                                                                                               | n/a                                                                                                                                               |
| Description of the most common schedule:                 | Use in females kept for replacement: 301                                                                                                                                           | Use in females kept for replacement: 106                                                                                                                                      | n/a                                                                                                                                               |
| Against clostridial infection                            | Yes: 316, no: 9                                                                                                                                                                    | Yes: 118, no: 1                                                                                                                                                               | 0.23                                                                                                                                              |
| Description of the most common schedule:                 | Use in pregnant females one month before expected start of lambing season: 275                                                                                                     | Use in pregnant females one month before expected start of kidding season: 105                                                                                                | 0.58                                                                                                                                              |



|                                                                                       |                                                                                                                                                                                              |                                                                                                                                                                                           |                                                              |
|---------------------------------------------------------------------------------------|----------------------------------------------------------------------------------------------------------------------------------------------------------------------------------------------|-------------------------------------------------------------------------------------------------------------------------------------------------------------------------------------------|--------------------------------------------------------------|
| Against mastitis                                                                      | Yes: 126, no: 199                                                                                                                                                                            | Yes: 34, no: 85                                                                                                                                                                           | 0.047                                                        |
| Description of the most common schedule:                                              | Use in pregnant females during gestation: 103                                                                                                                                                | Use in pregnant females during gestation: 31                                                                                                                                              | 0.12                                                         |
| Against contagious agalactia                                                          | Yes: 186, no: 139                                                                                                                                                                            | Yes: 65, no: 54                                                                                                                                                                           | 0.62                                                         |
| Description of the most common schedule:                                              | Use in pregnant females three months before expected start of lambing season: 38                                                                                                             | Use in pregnant females three months before expected start of kidding season: 18                                                                                                          | 0.23                                                         |
| Against bacterial respiratory infections                                              | Yes: 144, no: 181                                                                                                                                                                            | Yes: 39, no: 80                                                                                                                                                                           | 0.028                                                        |
| Description of the most common schedule:                                              | Use in association with vaccine against clostridial infections: 129                                                                                                                          | Use in association with vaccine against clostridial infections: 32                                                                                                                        | 0.20                                                         |
| Against orf                                                                           | Yes: 3, no: 322                                                                                                                                                                              | Yes: 1, no: 118                                                                                                                                                                           | 0.93                                                         |
| Description of the most common schedule:                                              | Use under special administration licence: 3                                                                                                                                                  | Use under special administration licence: 1                                                                                                                                               | n/a                                                          |
| Against paratuberculosis                                                              | Yes: 11, no: 314                                                                                                                                                                             | Use: 31, no: 88                                                                                                                                                                           | < 0.0001                                                     |
| Description of the most common schedule:                                              | Use in ewe-lambs: 11                                                                                                                                                                         | Use in doelings: 31                                                                                                                                                                       | n/a                                                          |
| Against foot-rot                                                                      | Yes: 5, no: 320                                                                                                                                                                              | Yes: 0, no: 119                                                                                                                                                                           | 0.17                                                         |
| Description of the most common schedule:                                              | Use in cases of disease in the farm: 5                                                                                                                                                       | n/a                                                                                                                                                                                       | n/a                                                          |
| <b>Antiparasitic administrations – Anthelmintic treatments to small ruminants</b>     |                                                                                                                                                                                              |                                                                                                                                                                                           |                                                              |
| Administration of anthelmintics to sheep / goats in the farm                          | Yes: 322, no: 3                                                                                                                                                                              | Yes: 117, no: 2                                                                                                                                                                           | 0.50                                                         |
| Timing of administration within the annual production cycle                           | Before the mating season: 24, continuously: 2, final stage of pregnancy: 221, initial stage of dry period: 170, 1st-2nd month of lactation period: 89, 3rd-6th month of lactation period: 32 | Before the mating season: 7, continuously: 0, final stage of pregnancy: 79, initial stage of dry period: 74, 1st-2nd month of lactation period: 33, 3rd-6th month of lactation period: 10 | Initial stage of dry period: 0.026, all others: > 0.29       |
| Anthelmintics administered                                                            | Albendazole: 201, closantel: 11, eprinomectin: 85, fenbendazole: 46, ivermectin: 180, levamisole: 8, moxidectin: 15, netobimin: 30, oxfendazole: 19, rafoxanide: 15                          | Albendazole: 75, closantel: 5, eprinomectin: 41, fenbendazole: 23, ivermectin: 65, levamisole: 2, moxidectin: 3, netobimin: 8, oxfendazole: 6, rafoxanide: 4                              | > 0.10                                                       |
| Pharmaceutical form administered                                                      | Tablet: 221, injectable solution: 183, oral drench: 150, pour-on: 10, premix: 2                                                                                                              | Tablet: 88, injectable solution: 71, oral drench: 47, pour-on: 9, premix: 0                                                                                                               | Pour-on: 0.037, all others: > 0.18                           |
| Use of environmental applications for helminth control                                | Yes: 157, no: 168                                                                                                                                                                            | Yes: 50, no: 69                                                                                                                                                                           | 0.24                                                         |
| Which ones                                                                            | Disinfection: 157                                                                                                                                                                            | Disinfection: 50                                                                                                                                                                          | n/a                                                          |
| <b>Antiparasitic administrations – Ectoparasiticide treatments to small ruminants</b> |                                                                                                                                                                                              |                                                                                                                                                                                           |                                                              |
| Administration of ectoparasiticides to sheep / goats in the farm                      | Yes: 109, no: 216                                                                                                                                                                            | Yes: 69, no: 50                                                                                                                                                                           | < 0.0001                                                     |
| Timing of administration within the annual production cycle                           | Before the mating season: 7, final stage of pregnancy: 60, initial stage of dry-period: 49, 1st-2nd month of lactation period: 8, 3rd-6th month of lactation period: 2                       | Before the mating season: 5, final stage of pregnancy: 38, initial stage of dry-period: 31, 1st-2nd month of lactation period: 8, 3rd-6th month of lactation period: 5                    | 3rd-6th month of lactation period: 0.002, all others: > 0.15 |
| Ectoparasiticides administered                                                        | Cypermethrin: 47, deltamethrin: 51, eprinomectin: 2, ivermectin: 1, phoxim: 26                                                                                                               | Cypermethrin: 31, deltamethrin: 38, eprinomectin: 1, ivermectin: 1, phoxim: 16                                                                                                            | > 0.30                                                       |



|                                                                                     |                                                                                                                                                                                                                                                           |                                                                                                                                                                                                                                                          |          |
|-------------------------------------------------------------------------------------|-----------------------------------------------------------------------------------------------------------------------------------------------------------------------------------------------------------------------------------------------------------|----------------------------------------------------------------------------------------------------------------------------------------------------------------------------------------------------------------------------------------------------------|----------|
| Pharmaceutical form administered                                                    | Pour-on solution: 93, solution for spraying: 25, injectable solution: 1                                                                                                                                                                                   | Pour-on solution: 58, solution for spraying: 16, injectable solution: 1                                                                                                                                                                                  | 0.46     |
| Use of environmental applications for ectoparasite control                          | Yes: 10, no: 315                                                                                                                                                                                                                                          | Yes: 5, no: 114                                                                                                                                                                                                                                          | 0.56     |
| Which ones                                                                          | Spraying: 10                                                                                                                                                                                                                                              | Spraying: 5                                                                                                                                                                                                                                              | n/a      |
| <b>Antiparasitic administrations – Antiparasitic treatments to dogs in the farm</b> |                                                                                                                                                                                                                                                           |                                                                                                                                                                                                                                                          |          |
| Administration of antiparasitics to dogs in the farm                                | Yes: 256, no: 41                                                                                                                                                                                                                                          | Yes: 95, no: 20                                                                                                                                                                                                                                          | 0.36     |
| Antiparasitics used                                                                 | Febantel: 236, fluralaner: 2, ivermectin: 20, isoxazoline: 14, milbemycin: 15, praziquantel: 237, pyrantel: 236                                                                                                                                           | Febantel: 85, fluralaner: 3, ivermectin: 8, isoxazoline: 5, milbemycin: 8, praziquantel: 87, pyrantel: 85                                                                                                                                                | > 0.09   |
| Pharmaceutical form administered                                                    | Injectable solution: 6, tablet: 253                                                                                                                                                                                                                       | Injectable solution: 3, tablet: 95                                                                                                                                                                                                                       | > 0.15   |
| <b>Other health management practices</b>                                            |                                                                                                                                                                                                                                                           |                                                                                                                                                                                                                                                          |          |
| Application of disinfections in the farm                                            | Yes: 296, no: 29                                                                                                                                                                                                                                          | Yes: 102, no: 17                                                                                                                                                                                                                                         | 0.10     |
| Annual frequency of systemic disinfections in the farm                              | $\bar{X}$ : 3.6 ± 0.2 occasions                                                                                                                                                                                                                           | $\bar{X}$ : 4.3 ± 0.5 occasions                                                                                                                                                                                                                          | 0.08     |
| Administration of oxytetracycline to the pregnant animals                           | Yes: 156, no: 169                                                                                                                                                                                                                                         | Yes: 60, no: 59                                                                                                                                                                                                                                          | 0.65     |
| Administration of selenium to pregnant animals                                      | Yes: 97, no: 228                                                                                                                                                                                                                                          | Yes: 37, no: 82                                                                                                                                                                                                                                          | 0.80     |
| Administration of selenium to newborn animals                                       | Yes: 228, no: 97                                                                                                                                                                                                                                          | Yes: 67, no: 52                                                                                                                                                                                                                                          | 0.006    |
| Administration of 'dry-ewe' treatment at the end of the lactation period            | Yes: 53, no: 272                                                                                                                                                                                                                                          | Yes: 15, no: 104                                                                                                                                                                                                                                         | 0.34     |
| Use of teat disinfection after milking                                              | Yes: 52, no: 273                                                                                                                                                                                                                                          | Yes: 12, no: 107                                                                                                                                                                                                                                         | 0.12     |
| Use of teat spraying after milking                                                  | Yes: 0, no: 325                                                                                                                                                                                                                                           | Yes: 0, no: 119                                                                                                                                                                                                                                          | n/a      |
| Weekly frequency of changing teat disinfectant in the cup                           | $\bar{X}$ : 1.6 ± 0.1 occasions                                                                                                                                                                                                                           | $\bar{X}$ : 1.8 ± 0.1 occasions                                                                                                                                                                                                                          | 0.45     |
| Foot care                                                                           | Yes: 224, no: 101                                                                                                                                                                                                                                         | Yes: 72, no: 47                                                                                                                                                                                                                                          | 0.10     |
| Annual frequency of foot care                                                       | $\bar{X}$ : 1.4 ± 0.1 occasions                                                                                                                                                                                                                           | $\bar{X}$ : 1.3 ± 0.1 occasions                                                                                                                                                                                                                          | 0.37     |
| Shearing                                                                            | Yes: 319, no: 6                                                                                                                                                                                                                                           | Yes: 102, no: 17                                                                                                                                                                                                                                         | < 0.0001 |
| Shearing equipment used                                                             | Shearing shears: 182, shearing machine: 137                                                                                                                                                                                                               | Shearing shears: 53, shearing machine: 49                                                                                                                                                                                                                | 0.37     |
| Recording of births – maintenance of a lambing / kidding book                       | Yes: 182, no: 143                                                                                                                                                                                                                                         | Yes: 53, no: 66                                                                                                                                                                                                                                          | 0.032    |
| Disinfection of navel stumps in newborns                                            | Yes: 213, no: 112                                                                                                                                                                                                                                         | Yes: 65, no: 54                                                                                                                                                                                                                                          | 0.035    |
| Tail docking in newborns                                                            | Yes: 244, no: 81                                                                                                                                                                                                                                          | Yes: 34, no: 85                                                                                                                                                                                                                                          | < 0.0001 |
| Routine administration of antimicrobials in newborns                                | Yes: 65, no: 260                                                                                                                                                                                                                                          | Yes: 29, no: 90                                                                                                                                                                                                                                          | 0.32     |
| Antimicrobials administered                                                         | Amoxicillin: 17, ampicillin: 1, cephalosporins: 0, cloxacillin: 1, enrofloxacin: 5, gamithromycin: 1, gentamicin: 3, lincomycin: 1, oxytetracycline: 36, penicillin: 12, spectinomycin: 2, streptomycin: 5, sulfonamides: 0, tulathromycin: 2, tylosin: 1 | Amoxicillin: 10, ampicillin: 2, cephalosporins: 2, cloxacillin: 0, enrofloxacin: 3, gamithromycin: 0, gentamicin: 1, lincomycin: 0, oxytetracycline: 15, penicillin: 6, spectinomycin: 0, streptomycin: 4, sulfonamides: 1, tulathromycin: 0, tylosin: 0 | > 0.19   |
| Maintenance of quarantine period for new animals into the farm                      | Yes: 211, no: 114                                                                                                                                                                                                                                         | Yes: 61, no: 58                                                                                                                                                                                                                                          | 0.009    |
| Isolation of sick animals                                                           | Yes: 276, no: 49                                                                                                                                                                                                                                          | Yes: 98, no: 21                                                                                                                                                                                                                                          | 0.51     |
| <b>Vectors</b>                                                                      |                                                                                                                                                                                                                                                           |                                                                                                                                                                                                                                                          |          |
| Presence of spots suitable for reproduction of vectors                              | Yes: 223, no: 102                                                                                                                                                                                                                                         | Yes: 83, no: 36                                                                                                                                                                                                                                          | 0.82     |
| Types of spots identified                                                           | Muddy spots inside or outside the buildings, near the water troughs: 194, spots of wet manure: 30, ditches with manure: 0                                                                                                                                 | Muddy spots inside or outside the buildings, near the water troughs: 74, spots of wet manure: 10, ditches with manure: 0                                                                                                                                 | > 0.30   |

|                                                                                    |                                                                                                                                                                                                                                                                       |                                                                                                                                                                                                                                                                |                                                                                                |
|------------------------------------------------------------------------------------|-----------------------------------------------------------------------------------------------------------------------------------------------------------------------------------------------------------------------------------------------------------------------|----------------------------------------------------------------------------------------------------------------------------------------------------------------------------------------------------------------------------------------------------------------|------------------------------------------------------------------------------------------------|
| Distance of spots from farm                                                        | > 50 m: 128, 50-500 m: 58,<br>> 500 m: 37                                                                                                                                                                                                                             | > 50 m: 57, 50-500 m: 17,<br>> 500 m: 9                                                                                                                                                                                                                        | > 50 m:<br>0.036, all<br>others: ><br>0.10                                                     |
| <b>NUTRITION</b>                                                                   |                                                                                                                                                                                                                                                                       |                                                                                                                                                                                                                                                                |                                                                                                |
| Grazing practiced                                                                  | Yes: 281, no: 44                                                                                                                                                                                                                                                      | Yes: 112, no: 7                                                                                                                                                                                                                                                | 0.025                                                                                          |
| Duration of grazing during the winter                                              | $\bar{X}$ : 3.6 ± 0.1 months                                                                                                                                                                                                                                          | $\bar{X}$ : 4.4 ± 0.2 months                                                                                                                                                                                                                                   | 0.002                                                                                          |
| Distance from farm of area grazed during the winter                                | $\bar{X}$ : 1.3 ± 0.1 km                                                                                                                                                                                                                                              | $\bar{X}$ : 2.2 ± 0.2 km                                                                                                                                                                                                                                       | 0.0009                                                                                         |
| Duration of grazing during the summer                                              | $\bar{X}$ : 4.9 ± 0.1 months                                                                                                                                                                                                                                          | $\bar{X}$ : 5.0 ± 0.2 months                                                                                                                                                                                                                                   | 0.82                                                                                           |
| Distance from farm of area grazed during the summer                                | $\bar{X}$ : 1.6 ± 0.1 km                                                                                                                                                                                                                                              | $\bar{X}$ : 2.4 ± 0.2 km                                                                                                                                                                                                                                       | 0.004                                                                                          |
| Type of graze area                                                                 | Forest: 18, hay: 4, meadow: 204, olive trees: 2, scrub pasture: 83, wetland: 16                                                                                                                                                                                       | Forest: 23, hay: 5, meadow: 59, olive trees: 0, scrub pasture: 58, wetland: 5                                                                                                                                                                                  | Meadow, scrub pasture, forest: < 0.0001, all others: > 0.26                                    |
| Common grazing for sheep and goats                                                 | Yes: 48, no: 277                                                                                                                                                                                                                                                      | Yes: 40, no: 79                                                                                                                                                                                                                                                | < 0.0001                                                                                       |
| Provision of hay as fodder to animals                                              | Yes: 324, no: 1                                                                                                                                                                                                                                                       | Yes: 116, no: 3                                                                                                                                                                                                                                                | 0.029                                                                                          |
| Total quantity of hay consumed during the preceding season                         | $\bar{X}$ : 84 ± 5 tonnes                                                                                                                                                                                                                                             | $\bar{X}$ : 46 ± 7 tonnes                                                                                                                                                                                                                                      | 0.0003                                                                                         |
| Plants included in hay consumed by animals                                         | <i>Avena sativa</i> : 25, <i>Euphorbia pulcherrima</i> : 1, <i>Hordeum vulgare</i> : 22, <i>Lolium</i> : 15, <i>Medicago sativa</i> : 10, <i>Pisum sativum</i> : 7, <i>Polygonum aviculare</i> : 2, <i>Trifolium</i> : 295, <i>Triticum</i> : 5, 0, <i>Vicia</i> : 25 | <i>Avena sativa</i> : 21, <i>Euphorbia pulcherrima</i> : 0, <i>Hordeum vulgare</i> : 8, <i>Lolium</i> : 1, <i>Medicago sativa</i> : 2, <i>Pisum sativum</i> : 2, <i>Polygonum aviculare</i> : 2, <i>Trifolium</i> : 106, <i>Triticum</i> : 0, <i>Vicia</i> : 7 | <i>Medicago sativa</i> , <i>Pisum sativum</i> , <i>Triticum</i> : < 0.0001, all others: > 0.09 |
| Hay type                                                                           | Roughage: 323, pelleted: 8                                                                                                                                                                                                                                            | Roughage: 115, pelleted: 1                                                                                                                                                                                                                                     | > 0.25                                                                                         |
| Origin of hay                                                                      | Own production: 193, purchase: 206                                                                                                                                                                                                                                    | Own production: 55, purchase: 81                                                                                                                                                                                                                               | Own production: 0.005, purchase: 0.11                                                          |
| Provision of straw to animals                                                      | Yes: 258, no: 67                                                                                                                                                                                                                                                      | Yes: 78, no: 41                                                                                                                                                                                                                                                | 0.003                                                                                          |
| Provision of silage to adult animals                                               | Yes: 72, no: 253                                                                                                                                                                                                                                                      | Yes: 18, no: 101                                                                                                                                                                                                                                               | 0.10                                                                                           |
| Provision of silage to young animals                                               | Yes: 18, no: 307                                                                                                                                                                                                                                                      | Yes: 4, no: 115                                                                                                                                                                                                                                                | 0.35                                                                                           |
| Total quantity of silage consumed during the preceding season                      | $\bar{X}$ : 142 ± 31 tonnes                                                                                                                                                                                                                                           | $\bar{X}$ : 98 ± 35 tonnes                                                                                                                                                                                                                                     | 0.50                                                                                           |
| Origin of silage                                                                   | Own production: 36, purchase: 42                                                                                                                                                                                                                                      | Own production: 10, purchase: 12                                                                                                                                                                                                                               | > 0.25                                                                                         |
| Provision of finished feed to animals                                              | Yes: 304, no: 21                                                                                                                                                                                                                                                      | Yes: 103, no: 16                                                                                                                                                                                                                                               | 0.018                                                                                          |
| Origin of concentrate                                                              | Own production: 36, purchase: 42                                                                                                                                                                                                                                      | Own production: 10, purchase: 12                                                                                                                                                                                                                               | > 0.25                                                                                         |
| Provision of finished feed (concentrate) to animals throughout the year            | Yes: 304, no: 21                                                                                                                                                                                                                                                      | Yes: 103, no: 16                                                                                                                                                                                                                                               | 0.018                                                                                          |
| Finished feed (concentrate) form provided to adult animals                         | Flakes: 4, mash: 113, pellets: 103, small pellets: 92                                                                                                                                                                                                                 | Flakes: 0, mash: 33, pellets: 36, small pellets: 38                                                                                                                                                                                                            | > 0.10                                                                                         |
| Provision of finished feed (concentrate) to young animals                          | Yes: 255, no: 70                                                                                                                                                                                                                                                      | Yes: 79, no: 40                                                                                                                                                                                                                                                | 0.009                                                                                          |
| Finished feed (concentrate) type provided to young animals                         | Flakes: 0, mash: 102, pellets: 82, small pellets: 80                                                                                                                                                                                                                  | Flakes: 0, mash: 26, pellets: 22, small pellets: 35                                                                                                                                                                                                            | Small pellets: 0.017, all others: > 0.12                                                       |
| Total quantity of finished feed (concentrate) consumed during the preceding season | $\bar{X}$ : 86 ± 6 tonnes                                                                                                                                                                                                                                             | $\bar{X}$ : 66 ± 8 tonnes                                                                                                                                                                                                                                      | 0.12                                                                                           |
| Total quantity of raw materials purchased during the preceding season              | $\bar{X}$ : 63 ± 5 tonnes                                                                                                                                                                                                                                             | $\bar{X}$ : 53 ± 6 tonnes                                                                                                                                                                                                                                      | 0.12                                                                                           |

|                                                                              |                                                                                                                                                                        |                                                                                                                                                                       |                                                                                                                              |
|------------------------------------------------------------------------------|------------------------------------------------------------------------------------------------------------------------------------------------------------------------|-----------------------------------------------------------------------------------------------------------------------------------------------------------------------|------------------------------------------------------------------------------------------------------------------------------|
| Raw materials used by the farm in the diets                                  | Barley: 227, bran: 185, cottonseed meal: 84, maize: 294, soyabean meal: 201, sunflower meal: 78, wheat: 104                                                            | Barley: 86, bran: 66, cottonseed meal: 42, maize: 110, soyabean meal: 68, sunflower meal: 28, wheat: 42                                                               | cottonseed meal: 0.025, all others: > 0.18<br>maize: 0.016, cottonseed meal: 0.020, soyabean meal: 0.040, all others: > 0.05 |
| Raw materials purchased by the farm for use in the diets                     | Barley: 205, bran: 196, cottonseed meal: 100, maize: 258, soyabean meal: 215, sunflower meal: 87, wheat: 87                                                            | Barley: 84, bran: 68, cottonseed meal: 49, maize: 105, soyabean meal: 68, sunflower meal: 29, wheat: 41                                                               | 0.08                                                                                                                         |
| Premix purchase for use in the diets                                         | Yes: 286, no: 39                                                                                                                                                       | Yes: 97, no: 22                                                                                                                                                       | < 0.0001                                                                                                                     |
| Feed change in animals                                                       | Abrupt: 3, progressive: 314                                                                                                                                            | Abrupt: 2, progressive: 114                                                                                                                                           | < 0.0001                                                                                                                     |
| Application of hydroponics cultivations                                      | Yes: 4, no: 321                                                                                                                                                        | Yes: 1, no: 118                                                                                                                                                       | < 0.0001                                                                                                                     |
| Water source                                                                 | Local water board: 211, local water drilling: 103, other: 25                                                                                                           | Local water board: 74, local water drilling: 34, other: 16                                                                                                            | > 0.26                                                                                                                       |
| Use of laboratory examinations for quality testing of feeds and raw material | Yes: 79, no: 246                                                                                                                                                       | Yes: 19, no: 100                                                                                                                                                      | < 0.0001                                                                                                                     |
| Laboratory examinations used                                                 | Chemical analysis: 37, microbiological examination: 4, mycotoxin detection: 39, residues analysis: 3                                                                   | Chemical analysis: 7, microbiological examination: 1, mycotoxin detection: 8, residues analysis: 2                                                                    | Residues analysis: 0.009, all others: > 0.21                                                                                 |
| Use of laboratory examinations for quality testing of water                  | Yes: 52, no: 273                                                                                                                                                       | Yes: 13, no: 106                                                                                                                                                      | < 0.0001                                                                                                                     |
| Laboratory examinations used                                                 | Overall assessment: 31, chemical analysis: 14, microbiological examination: 8, mycotoxin detection: 1                                                                  | Overall assessment: 8, chemical analysis: 6, microbiological examination: 4, mycotoxin detection: 0                                                                   | > 0.07                                                                                                                       |
| Person responsible for nutritional management                                | Farmer themselves: 198, veterinarian: 96, animal scientist: 81, other farmer: 0                                                                                        | Farmer themselves: 94, veterinarian: 28, animal scientist: 22, other farmer: 0                                                                                        | Farmer themselves: 0.0002, all others: > 0.07                                                                                |
| <b>HUMAN RESOURCES</b>                                                       |                                                                                                                                                                        |                                                                                                                                                                       |                                                                                                                              |
| <b>Farmer</b>                                                                |                                                                                                                                                                        |                                                                                                                                                                       |                                                                                                                              |
| Sex                                                                          | Female: 19, male: 316                                                                                                                                                  | Female: 11, male: 108                                                                                                                                                 | 0.21                                                                                                                         |
| Age                                                                          | X: 47 ± 1 years                                                                                                                                                        | X: 47 ± 1 years                                                                                                                                                       | 0.64                                                                                                                         |
| Length of previous animal farming experience                                 | X: 24 ± 1 years                                                                                                                                                        | X: 25 ± 1 years                                                                                                                                                       | 0.80                                                                                                                         |
| Highest level of general education                                           | Primary: 57, secondary: 225, tertiary: 43                                                                                                                              | Primary: 20, secondary: 89, tertiary: 10                                                                                                                              | 0.35                                                                                                                         |
| Professional education                                                       | Yes: 54, no: 171                                                                                                                                                       | Yes: 12, no: 107                                                                                                                                                      | 0.002                                                                                                                        |
| Professional education                                                       | Seminars re farming practice: 34, technological education: 6, meat processing training: 4, dairy processing training: 3, animal science degree: 2, farming analysis: 1 | Seminars re farming practice: 9, technological education: 2, meat processing training: 0, dairy processing training: 0, animal science degree: 1, farming analysis: 0 | > 0.18                                                                                                                       |

|                                                                                                                       |                                                                                                                                                                                      |                                                                                                                                                                                      |        |
|-----------------------------------------------------------------------------------------------------------------------|--------------------------------------------------------------------------------------------------------------------------------------------------------------------------------------|--------------------------------------------------------------------------------------------------------------------------------------------------------------------------------------|--------|
| Primary language spoken                                                                                               | Greek: 308, Turkish: 13, Albanian: 2, Bulgarian: 1, Indian: 1                                                                                                                        | Greek: 110, Turkish: 8, Albanian: 1, Bulgarian: 0, Indian: 0                                                                                                                         | 0.70   |
| Farmer by profession                                                                                                  | Yes: 292, no: 33                                                                                                                                                                     | Yes: 105, no: 14                                                                                                                                                                     | 0.63   |
| Daily period of presence in the farm                                                                                  | $\bar{X}$ : 11.5 $\pm$ 0.2 hours                                                                                                                                                     | $\bar{X}$ : 12.3 $\pm$ 0.3 hours                                                                                                                                                     | 0.047  |
| Marital status                                                                                                        | Single: 59, married: 166                                                                                                                                                             | Single: 28, married: 91                                                                                                                                                              | 0.58   |
| <b>Public health</b>                                                                                                  |                                                                                                                                                                                      |                                                                                                                                                                                      |        |
| Personal opinion regarding occurrence of transmission of diseases from animals to the farmer or members of the family | Yes: 44, no: 281                                                                                                                                                                     | Yes: 27, no: 92                                                                                                                                                                      | 0.020  |
| Diseases, according to above, for which transmission occurred from animals                                            | Anthrax: 1, brucellosis: 35, contagious ecthyma: 2, flea infestation: 2, fungal ( <i>Trichophyton</i> ) infection: 1, hydatid disease: 1, ophthalmic myiasis: 1, tick infestation: 1 | Anthrax: 1, brucellosis: 22, contagious ecthyma: 1, flea infestation: 1, fungal ( <i>Trichophyton</i> ) infection: 1, hydatid disease: 1, ophthalmic myiasis: 1, tick infestation: 0 | > 0.28 |
| <b>Family</b>                                                                                                         |                                                                                                                                                                                      |                                                                                                                                                                                      |        |
| Total members of the family                                                                                           | $\bar{X}$ : 4.3 $\pm$ 0.1 persons                                                                                                                                                    | $\bar{X}$ : 4.2 $\pm$ 0.1 persons                                                                                                                                                    | 0.57   |
| Family tradition in farming                                                                                           | Yes: 283, no: 42                                                                                                                                                                     | Yes: 104, no: 15                                                                                                                                                                     | 0.93   |
| Total members of the family working at the farm                                                                       | $\bar{X}$ : 2.2 $\pm$ 0.0 persons                                                                                                                                                    | $\bar{X}$ : 2.2 $\pm$ 0.0 persons                                                                                                                                                    | 0.34   |
| <b>Staff</b>                                                                                                          |                                                                                                                                                                                      |                                                                                                                                                                                      |        |
| Farm worker employment                                                                                                | Yes: 123, no: 202                                                                                                                                                                    | Yes: 34, no: 85                                                                                                                                                                      | 0.07   |
| Origin                                                                                                                | Greek local: 13, Greek from other part of the country: 6, non-Greek: 111                                                                                                             | Greek local: 3, Greek from other part of the country: 2, non-Greek: 32                                                                                                               | > 0.20 |
| Age                                                                                                                   | $\bar{X}$ : 34 $\pm$ 1 years                                                                                                                                                         | $\bar{X}$ : 35 $\pm$ 1 years                                                                                                                                                         | 0.37   |
| Previous farming experience at start of employment                                                                    | Yes: 104, no: 19                                                                                                                                                                     | Yes: 31, no: 3                                                                                                                                                                       | 0.32   |
| Length of previous animal farming experience                                                                          | $\bar{X}$ : 13 $\pm$ 1 years                                                                                                                                                         | $\bar{X}$ : 13 $\pm$ 1 years                                                                                                                                                         | 0.80   |

<sup>1</sup> *p*-value for comparison between sheep flocks and goat herds; <sup>2</sup> Management system classified according to the system of the European Food Safety Authority [Scientific opinion on the welfare risks related to the farming of sheep for wool, meat and milk production. *EFSA J.* 12, 3933–4060]; <sup>3</sup> Shaded cells indicate significant ( $p < 0.05$ ) differences between sheep flocks and goat herds for respective parameters; <sup>4</sup> Figures present mean  $\pm$  standard error of the mean ( $\bar{X} \pm \sigma_m$ ); <sup>5</sup> Figures present frequency ( $n$ ) for each category within the variable; <sup>6</sup> Figures present median (minimum – maximum) value; <sup>7</sup> Figures present average (95% confidence interval) value.

**Table S3.** Cumulative findings of all results obtained during field and laboratory examinations in samples collected from 444 small ruminant farms in a countrywide investigation in Greece, classified according to animal species in the farms.

|                                                                                                                                                                                                                                                                                                      | SHEEP FLOCKS<br><i>n</i> =325                                                                                                                                                                                                                                                                                                                                                                                                                                                                                                                                                                                       | GOAT HERDS<br><i>n</i> = 199                                                                                                                                                                                                                                                                                                                                                                                                                                                                                                                                                                                   | <i>p</i> -value <sup>1</sup>                               |
|------------------------------------------------------------------------------------------------------------------------------------------------------------------------------------------------------------------------------------------------------------------------------------------------------|---------------------------------------------------------------------------------------------------------------------------------------------------------------------------------------------------------------------------------------------------------------------------------------------------------------------------------------------------------------------------------------------------------------------------------------------------------------------------------------------------------------------------------------------------------------------------------------------------------------------|----------------------------------------------------------------------------------------------------------------------------------------------------------------------------------------------------------------------------------------------------------------------------------------------------------------------------------------------------------------------------------------------------------------------------------------------------------------------------------------------------------------------------------------------------------------------------------------------------------------|------------------------------------------------------------|
| <b>CLINICAL EXAMINATIONS OF ANIMALS AT THE FARMS</b>                                                                                                                                                                                                                                                 |                                                                                                                                                                                                                                                                                                                                                                                                                                                                                                                                                                                                                     |                                                                                                                                                                                                                                                                                                                                                                                                                                                                                                                                                                                                                |                                                            |
| Body condition scoring                                                                                                                                                                                                                                                                               | $\bar{X}$ : 2.38 ± 0.02 (scale: 0-5) <sup>3</sup>                                                                                                                                                                                                                                                                                                                                                                                                                                                                                                                                                                   | $\bar{X}$ : 2.54 ± 0.03 (scale: 0-5) <sup>3</sup>                                                                                                                                                                                                                                                                                                                                                                                                                                                                                                                                                              | < 0.0001 <sup>2</sup>                                      |
| <b>LABORATORY EXAMINATIONS IN BULK-TANK MILK</b>                                                                                                                                                                                                                                                     |                                                                                                                                                                                                                                                                                                                                                                                                                                                                                                                                                                                                                     |                                                                                                                                                                                                                                                                                                                                                                                                                                                                                                                                                                                                                |                                                            |
| <b>Somatic cell counting</b>                                                                                                                                                                                                                                                                         |                                                                                                                                                                                                                                                                                                                                                                                                                                                                                                                                                                                                                     |                                                                                                                                                                                                                                                                                                                                                                                                                                                                                                                                                                                                                |                                                            |
| Somatic cell counts                                                                                                                                                                                                                                                                                  | 0.488 × 10 <sup>6</sup> (0.451 × 10 <sup>6</sup> –0.529 × 10 <sup>6</sup> ) cells mL <sup>-1</sup> <sup>4</sup>                                                                                                                                                                                                                                                                                                                                                                                                                                                                                                     | 0.838 × 10 <sup>6</sup> (0.759 × 10 <sup>6</sup> –0.933 × 10 <sup>6</sup> ) cells mL <sup>-1</sup>                                                                                                                                                                                                                                                                                                                                                                                                                                                                                                             | < 0.0001 <sup>2</sup>                                      |
| <b>Microbiological examinations</b>                                                                                                                                                                                                                                                                  |                                                                                                                                                                                                                                                                                                                                                                                                                                                                                                                                                                                                                     |                                                                                                                                                                                                                                                                                                                                                                                                                                                                                                                                                                                                                |                                                            |
| Total bacterial counts                                                                                                                                                                                                                                                                               | 398 × 10 <sup>3</sup> (331 × 10 <sup>3</sup> –479 × 10 <sup>3</sup> ) cfu mL <sup>-1</sup>                                                                                                                                                                                                                                                                                                                                                                                                                                                                                                                          | 581 × 10 <sup>3</sup> (447 × 10 <sup>3</sup> –741 × 10 <sup>3</sup> ) cfu mL <sup>-1</sup>                                                                                                                                                                                                                                                                                                                                                                                                                                                                                                                     | < 0.0001                                                   |
| Staphylococcal isolation                                                                                                                                                                                                                                                                             | Yes: 206, no: 119 <sup>5</sup>                                                                                                                                                                                                                                                                                                                                                                                                                                                                                                                                                                                      | Yes: 75, no: 44                                                                                                                                                                                                                                                                                                                                                                                                                                                                                                                                                                                                | 0.94                                                       |
| Staphylococcal species identified                                                                                                                                                                                                                                                                    | <i>S. auricularis</i> : 3, <i>S. capitis</i> : 6, <i>S. carnosus</i> : 2, <i>S. chromogenes</i> : 13, <i>S. cohnii</i> subsp. <i>cohnii</i> : 4, <i>S. cohnii</i> subsp. <i>urealyticum</i> : 3, <i>S. epidermidis</i> : 4, <i>S. equorum</i> : 23, <i>S. haemolyticus</i> : 22, <i>S. hominis</i> : 2, <i>S. intermedius</i> : 6, <i>S. kloosii</i> : 7, <i>S. lentus</i> : 12, <i>S. lugdunensis</i> : 11, <i>S. pasteurii</i> : 2, <i>S. pettenkoferi</i> : 0, <i>S. saprophyticus</i> : 4, <i>S. sciuri</i> : 3, <i>S. simulans</i> : 35, <i>S. vitulinus</i> : 3, <i>S. warneri</i> : 9, <i>S. xylosus</i> : 4 | <i>S. auricularis</i> : 1, <i>S. capitis</i> : 6, <i>S. carnosus</i> : 0, <i>S. chromogenes</i> : 1, <i>S. cohnii</i> subsp. <i>cohnii</i> : 1, <i>S. cohnii</i> subsp. <i>urealyticum</i> : 2, <i>S. epidermidis</i> : 1, <i>S. equorum</i> : 11, <i>S. haemolyticus</i> : 4, <i>S. hominis</i> : 0, <i>S. intermedius</i> : 1, <i>S. kloosii</i> : 3, <i>S. lentus</i> : 5, <i>S. lugdunensis</i> : 2, <i>S. pasteurii</i> : 0, <i>S. pettenkoferi</i> : 3, <i>S. saprophyticus</i> : 0, <i>S. sciuri</i> : 0, <i>S. simulans</i> : 9, <i>S. vitulinus</i> : 4, <i>S. warneri</i> : 2, <i>S. xylosus</i> : 2 |                                                            |
| Biofilm formation in staphylococcal isolates                                                                                                                                                                                                                                                         | Yes: 166, no: 66                                                                                                                                                                                                                                                                                                                                                                                                                                                                                                                                                                                                    | Yes: 58, no: 22                                                                                                                                                                                                                                                                                                                                                                                                                                                                                                                                                                                                | 0.87                                                       |
| Resistance of staphylococci to ampicillin, azithromycin, cefoxitin, ciprofloxacin, clarithromycin, clindamycin, erythromycin, fosfomycin, fucidic acid, gentamicin, moxifloxacin, mupirocin, oxacillin, penicillin, rifampicin, teicoplanin, tetracycline, tobramycin, trimethoprim-sulfamethoxazole | Yes: 79, 0, 0, 2, 0, 41, 21, 31, 14, 2, 1, 1, 27, 79, 1, 0, 28, 2, 2, respectively, no: 153, 232, 232, 230, 232, 191, 211, 201, 218, 230, 231, 231, 205, 153, 231, 232, 204, 230, 230, respectively                                                                                                                                                                                                                                                                                                                                                                                                                 | Yes: 33, 0, 0, 0, 0, 19, 16, 22, 3, 0, 0, 0, 6, 33, 0, 1, 12, 1, 0, respectively, no: 47, 80, 80, 80, 80, 61, 64, 58, 77, 80, 80, 80, 74, 47, 80, 79, 68, 79, 80, respectively                                                                                                                                                                                                                                                                                                                                                                                                                                 | Fosfomycin: 0.002, erythromycin: 0.040, all others: > 0.11 |
| Listeria isolation                                                                                                                                                                                                                                                                                   | Yes: 4, no: 321                                                                                                                                                                                                                                                                                                                                                                                                                                                                                                                                                                                                     | Yes: 0, no: 119                                                                                                                                                                                                                                                                                                                                                                                                                                                                                                                                                                                                | 0.22                                                       |
| Listeria species identified                                                                                                                                                                                                                                                                          | <i>L. ivanovii</i> : 3, <i>L. monocytogenes</i> : 1                                                                                                                                                                                                                                                                                                                                                                                                                                                                                                                                                                 | n/a                                                                                                                                                                                                                                                                                                                                                                                                                                                                                                                                                                                                            | n/a                                                        |
| Resistance of listeria to benzylpenicillin, ampicillin, meropenem, erythromycin, trimethoprim/sulfamethoxazole                                                                                                                                                                                       | Yes: 0, 0, 0, 0, 0, respectively, No: 4, 4, 4, 4, 4, respectively                                                                                                                                                                                                                                                                                                                                                                                                                                                                                                                                                   | n/a                                                                                                                                                                                                                                                                                                                                                                                                                                                                                                                                                                                                            | n/a                                                        |
| <b>Composition analysis</b>                                                                                                                                                                                                                                                                          |                                                                                                                                                                                                                                                                                                                                                                                                                                                                                                                                                                                                                     |                                                                                                                                                                                                                                                                                                                                                                                                                                                                                                                                                                                                                |                                                            |
| Fat content                                                                                                                                                                                                                                                                                          | $\bar{X}$ : 6.16% ± 0.05%                                                                                                                                                                                                                                                                                                                                                                                                                                                                                                                                                                                           | $\bar{X}$ : 4.77% ± 0.44%                                                                                                                                                                                                                                                                                                                                                                                                                                                                                                                                                                                      | 0.0005                                                     |
| Protein content                                                                                                                                                                                                                                                                                      | $\bar{X}$ : 4.43% ± 0.01%                                                                                                                                                                                                                                                                                                                                                                                                                                                                                                                                                                                           | $\bar{X}$ : 3.23% ± 0.30%                                                                                                                                                                                                                                                                                                                                                                                                                                                                                                                                                                                      | 0.0008                                                     |
| Lactose content                                                                                                                                                                                                                                                                                      | $\bar{X}$ : 4.21% ± 0.02%                                                                                                                                                                                                                                                                                                                                                                                                                                                                                                                                                                                           | $\bar{X}$ : 4.74% ± 0.03%                                                                                                                                                                                                                                                                                                                                                                                                                                                                                                                                                                                      | < 0.0001                                                   |
| Added water                                                                                                                                                                                                                                                                                          | $\bar{X}$ : 0.68% ± 0.01%                                                                                                                                                                                                                                                                                                                                                                                                                                                                                                                                                                                           | $\bar{X}$ : 0.50% ± 0.02%                                                                                                                                                                                                                                                                                                                                                                                                                                                                                                                                                                                      | 0.37                                                       |
| <b>PARASITOLOGICAL EXAMINATIONS IN FAECES</b>                                                                                                                                                                                                                                                        |                                                                                                                                                                                                                                                                                                                                                                                                                                                                                                                                                                                                                     |                                                                                                                                                                                                                                                                                                                                                                                                                                                                                                                                                                                                                |                                                            |
| Detection of parasitic elements of trematodes                                                                                                                                                                                                                                                        | <i>Dicrocoelium dendriticum</i> : 54, <i>Fasciola hepatica</i> : 2, <i>Paramphistomum cervi</i> : 7                                                                                                                                                                                                                                                                                                                                                                                                                                                                                                                 | <i>Dicrocoelium dendriticum</i> : 18, <i>Fasciola hepatica</i> : 0, <i>Paramphistomum cervi</i> : 1                                                                                                                                                                                                                                                                                                                                                                                                                                                                                                            | > 0.19                                                     |
| Detection of parasitic elements of cestodes                                                                                                                                                                                                                                                          | <i>Moniezia</i> spp.: 61                                                                                                                                                                                                                                                                                                                                                                                                                                                                                                                                                                                            | <i>Moniezia</i> spp.: 30                                                                                                                                                                                                                                                                                                                                                                                                                                                                                                                                                                                       | 0.08                                                       |
| Detection of parasitic elements of intestinal nematodes                                                                                                                                                                                                                                              | <i>Teladorsagia</i> spp.: 278, <i>Haemonchus contortus</i> : 277,                                                                                                                                                                                                                                                                                                                                                                                                                                                                                                                                                   | <i>Teladorsagia</i> spp.: 106, <i>Haemonchus contortus</i> : 106,                                                                                                                                                                                                                                                                                                                                                                                                                                                                                                                                              | > 0.24                                                     |

|                                                          |                                                                                                                                                                                                                   |                                                                                                                                                                                                               |                                               |
|----------------------------------------------------------|-------------------------------------------------------------------------------------------------------------------------------------------------------------------------------------------------------------------|---------------------------------------------------------------------------------------------------------------------------------------------------------------------------------------------------------------|-----------------------------------------------|
|                                                          | <i>Ttichostrongylus</i> spp.: 257, <i>Chabertia</i> spp.: 206, <i>Cooperia</i> spp. 140, <i>Bunostomum</i> spp.: 65, <i>Nematodirus</i> spp.: 61, <i>Strongyloides papillosus</i> : 23, <i>Trichuris</i> spp.: 65 | <i>Ttichostrongylus</i> spp.: 98, <i>Chabertia</i> spp.: 81, <i>Cooperia</i> spp. 54, <i>Bunostomum</i> spp.: 33, <i>Nematodirus</i> spp.: 20, <i>Strongyloides papillosus</i> : 6, <i>Trichuris</i> spp.: 22 |                                               |
| epg counts                                               | X: 214 ± 13                                                                                                                                                                                                       | X: 219 ± 22                                                                                                                                                                                                   | 0.77                                          |
| Detection of parasitic elements of respiratory nematodes | Metastrongylidae family: 58                                                                                                                                                                                       | Metastrongylidae family: 28                                                                                                                                                                                   | 0.21                                          |
| Detection of parasitic elements of protozoa              | <i>Eimeria</i> spp.: 233, <i>Giardia</i> spp.: 106: <i>Cryptosporidium</i> spp.: 23                                                                                                                               | <i>Eimeria</i> spp.: 72, <i>Giardia</i> spp.: 40: <i>Cryptosporidium</i> spp.: 13                                                                                                                             | <i>Eimeria</i> spp.: 0.024, all others > 0.18 |

<sup>1</sup> *p*-value for comparison between sheep flocks and goat herds; <sup>2</sup> Shaded cells indicate significant (*p* < 0.05) differences between sheep flocks and goat herds for respective parameters; <sup>3</sup> Figures present mean ± standard error of the mean ( $\bar{X} \pm \sigma_M$ ); <sup>4</sup> Figures present mean (95% confidence interval); <sup>5</sup> Figures present frequency (*n*) for each category within the variable.

**Table S4.** Season of the year during which visits were made to 444 small ruminant farms in a countrywide investigation in Greece.

| Season of the year | Number of farms visited (proportion) |
|--------------------|--------------------------------------|
| Autumn             | 41 (9.2%)                            |
| Winter             | 110 (24.8%)                          |
| Spring             | 151 (34.0%)                          |
| Summer             | 142 (32.0%)                          |



**Table S5.** Management system applied in 444 small ruminant farms in a countrywide investigation in Greece in accord with the location of the farms.

| Sheep flocks ( <i>n</i> = 325)        |                                  |         |       |       |
|---------------------------------------|----------------------------------|---------|-------|-------|
| Management system<br>applied in farms | Geographical area of the country |         |       |       |
|                                       | Central                          | Islands | North | South |
| Intensive                             | 5.9% <sup>1</sup>                | 0.9%    | 5.2%  | 1.5%  |
| semi-Intensive                        | 22.5%                            | 2.5%    | 10.8% | 7.4%  |
| semi-Extensive                        | 9.8%                             | 4.6%    | 10.2% | 11.1% |
| Extensive                             | 0.9%                             | 5.2%    | 0.6%  | 0.9%  |
| Goat herds ( <i>n</i> = 119)          |                                  |         |       |       |
| Management system<br>applied in farms | Geographical area of the country |         |       |       |
|                                       | Central                          | Islands | North | South |
| Intensive                             | 5.9% <sup>1</sup>                | 0.9%    | 0.9%  | 0.0%  |
| semi-Intensive                        | 5.9%                             | 0.8%    | 12.6% | 5.0%  |
| semi-Extensive                        | 13.5%                            | 6.7%    | 14.3% | 16.8% |
| Extensive                             | 5.0%                             | 5.0%    | 2.5%  | 4.2%  |

<sup>1</sup>: proportions refer to total farms with the same animal species.

**Table S6.** Breed of ewes and does in 444 small ruminant farms in a countrywide investigation in Greece in accord with the management applied therein.

| Sheep flocks ( <i>n</i> = 325)                               |                                    |                |                |           |
|--------------------------------------------------------------|------------------------------------|----------------|----------------|-----------|
| Animal breed                                                 | Management system applied in farms |                |                |           |
|                                                              | Intensive                          | Semi-Intensive | Semi-Extensive | Extensive |
| Assaf ( <i>n</i> = 30) <sup>1</sup>                          | 16.6% <sup>1</sup>                 | 56.7%          | 26.7%          | 0.0%      |
| Awassi ( <i>n</i> = 1)                                       | 0.0%                               | 100.0%         | 0.0%           | 0.0%      |
| Boutsiko ( <i>n</i> = 2)                                     | 0.0%                               | 0.0%           | 100.0%         | 0.0%      |
| Chios ( <i>n</i> = 44)                                       | 22.7%                              | 45.5%          | 31.8%          | 0.0%      |
| Crossbreds ( <i>n</i> = 43)                                  | 7.0%                               | 39.5%          | 46.5%          | 7.0%      |
| Friesarta ( <i>n</i> = 12)                                   | 25.0%                              | 33.3%          | 33.3%          | 8.4%      |
| Friesian ( <i>n</i> = 13)                                    | 0.0%                               | 46.2%          | 53.8%          | 0.0%      |
| Karagouniko ( <i>n</i> = 5)                                  | 0.0%                               | 60.0%          | 20.0%          | 20.0%     |
| Kefallinia ( <i>n</i> = 1)                                   | 0.0%                               | 0.0%           | 100.0%         | 0.0%      |
| Lacaune ( <i>n</i> = 95)                                     | 21.1%                              | 54.7%          | 23.2%          | 1.0%      |
| 'Local' <sup>2</sup> ( <i>n</i> = 55)                        | 3.7%                               | 21.8%          | 52.7%          | 21.8%     |
| Mytilini ( <i>n</i> = 18)                                    | 5.6%                               | 44.4%          | 33.3%          | 16.7%     |
| Sfakia ( <i>n</i> = 6)                                       | 0.0%                               | 0.0%           | 33.3%          | 66.7%     |
| Goat herds ( <i>n</i> = 119)                                 |                                    |                |                |           |
| Animal breed                                                 | Management system applied in farms |                |                |           |
|                                                              | Intensive                          | Semi-Intensive | Semi-Extensive | Extensive |
| Alpine ( <i>n</i> = 9) <sup>1</sup>                          | 11.1% <sup>1</sup>                 | 11.1%          | 77.8%          | 0.0%      |
| Crossbreds ( <i>n</i> = 18)                                  | 5.5%                               | 16.7%          | 77.8%          | 0.0%      |
| Damascus ( <i>n</i> = 18)                                    | 0.0%                               | 50.0%          | 44.4%          | 5.6%      |
| Kefallinia ( <i>n</i> = 1)                                   | 0.0%                               | 0.0%           | 100.0%         | 0.0%      |
| Indigenous Greek<br>( <i>Capra prisca</i> ) ( <i>n</i> = 50) | 2.0%                               | 10.0%          | 54.0%          | 34.0%     |
| Murciano-Granadina<br>( <i>n</i> = 13)                       | 38.5%                              | 53.8%          | 7.7%           | 0.0%      |
| Saanen ( <i>n</i> = 5)                                       | 20.0%                              | 60.0%          | 20.0%          | 0.0%      |
| Skopelos ( <i>n</i> = 5)                                     | 0.0%                               | 20.0%          | 40.0%          | 40.0%     |

<sup>1</sup>: proportions refer to farms with the same breed of animals; <sup>2</sup>: the term used by the respective farmers to refer to a variety of small-scale breeds, not always related between them, and each one prevailing only in some areas of the country with limited geographic dissemination

**Table S7.** Breed of ewes and does in 444 small ruminant farms in a countrywide investigation in Greece in accord with the milking mode applied in the farms.

| Sheep flocks ( <i>n</i> = 325)                               |                                    |                             |
|--------------------------------------------------------------|------------------------------------|-----------------------------|
| Animal breed                                                 | Milking mod applied in the farms   |                             |
|                                                              | Machine-milking                    | Hand-milking                |
| Assaf ( <i>n</i> = 30) <sup>1</sup>                          | 93.3% <sup>1</sup>                 | 6.7%                        |
| Awassi ( <i>n</i> = 1)                                       | 100.0%                             | 0.0%                        |
| Boutsko ( <i>n</i> = 2)                                      | 0.0%                               | 100.0%                      |
| Chios ( <i>n</i> = 44)                                       | 77.3%                              | 22.7%                       |
| Crossbreds ( <i>n</i> = 43)                                  | 72.1%                              | 27.9%                       |
| Friesarta ( <i>n</i> = 12)                                   | 91.7%                              | 8.3%                        |
| Friesian ( <i>n</i> = 13)                                    | 46.2%                              | 53.8%                       |
| Karagouniko ( <i>n</i> = 5)                                  | 80.0%                              | 20.0%                       |
| Kefallinia ( <i>n</i> = 1)                                   | 100.0%                             | 0.0%                        |
| Lacaune ( <i>n</i> = 95)                                     | 96.8%                              | 3.2%                        |
| 'Local' <sup>2</sup> ( <i>n</i> = 55)                        | 56.4%                              | 43.6%                       |
| Mytilini ( <i>n</i> = 18)                                    | 83.3%                              | 16.7%                       |
| Sfakia ( <i>n</i> = 6)                                       | 16.7%                              | 83.3%                       |
| Goat herds ( <i>n</i> = 119)                                 |                                    |                             |
| Animal breed                                                 | Management system applied in farms |                             |
|                                                              | Intensive or Semi-intensive        | Semi-extensive or Extensive |
| Alpine ( <i>n</i> = 9) <sup>1</sup>                          | 66.7% <sup>1</sup>                 | 33.3%                       |
| Crossbreds ( <i>n</i> = 18)                                  | 83.3%                              | 16.7%                       |
| Damascus ( <i>n</i> = 18)                                    | 55.6%                              | 44.4%                       |
| Kefallinia ( <i>n</i> = 1)                                   | 100.0%                             | 0.0%                        |
| Indigenous Greek<br>( <i>Capra prisca</i> ) ( <i>n</i> = 50) | 36.0%                              | 64.0%                       |
| Murciano-Granadina<br>( <i>n</i> = 13)                       | 84.6%                              | 15.4%                       |
| Saanen ( <i>n</i> = 5)                                       | 80.0%                              | 20.0%                       |
| Skopelos ( <i>n</i> = 5)                                     | 20.0%                              | 80.0%                       |

<sup>1</sup>: proportions refer to farms with the same breed of animals; <sup>2</sup>: the term used by the respective farmers to refer to a variety of small-scale breeds, not always related between them, and each one prevailing only in some areas of the country with limited geographic dissemination

**Table S8.** Breed of ewes and does in 444 small ruminant farms in a countrywide investigation in Greece in accord with the location of the farms.

| Sheep flocks ( <i>n</i> = 325)                               |                                  |         |        |       |
|--------------------------------------------------------------|----------------------------------|---------|--------|-------|
| Animal breed                                                 | Geographical area of the country |         |        |       |
|                                                              | Central                          | Islands | North  | South |
| Assaf ( <i>n</i> = 30) <sup>1</sup>                          | 26.7% <sup>1</sup>               | 3.3%    | 36.7%  | 33.3% |
| Awassi ( <i>n</i> = 1)                                       | 100.0%                           | 0.0%    | 0.0%   | 0.0%  |
| Boutsko ( <i>n</i> = 2)                                      | 50.0%                            | 0.0%    | 0.0%   | 50.0% |
| Chios ( <i>n</i> = 44)                                       | 38.7%                            | 6.8%    | 47.7%  | 6.8%  |
| Crossbreds ( <i>n</i> = 43)                                  | 58.1%                            | 4.7%    | 18.6%  | 18.6% |
| Friesarta ( <i>n</i> = 12)                                   | 75.0%                            | 0.0%    | 16.7%  | 8.3%  |
| Friesian ( <i>n</i> = 13)                                    | 15.4%                            | 0.0%    | 23.1%  | 61.5% |
| Karagouniko ( <i>n</i> = 5)                                  | 80.0%                            | 0.0%    | 20.0%  | 0.0%  |
| Kefallinia ( <i>n</i> = 1)                                   | 0.0%                             | 100.0%  | 0.0%   | 0.0%  |
| Lacaune ( <i>n</i> = 95)                                     | 47.4%                            | 2.1%    | 33.7%  | 16.8% |
| 'Local' <sup>2</sup> ( <i>n</i> = 55)                        | 27.3%                            | 20.0%   | 16.3%  | 36.4% |
| Mytilini ( <i>n</i> = 18)                                    | 0.0%                             | 94.4%   | 0.0%   | 5.6%  |
| Sfakia ( <i>n</i> = 6)                                       | 0.0%                             | 100.0%  | 0.0%   | 0.0%  |
| Goat herds ( <i>n</i> = 119)                                 |                                  |         |        |       |
| Animal breed                                                 | Geographical area of the country |         |        |       |
|                                                              | Central                          | Islands | North  | South |
| Alpine ( <i>n</i> = 9) <sup>1</sup>                          | 22.2% <sup>1</sup>               | 33.4%   | 22.2%  | 22.2% |
| Crossbreds ( <i>n</i> = 18)                                  | 16.7%                            | 0.0%    | 50.0%  | 33.3% |
| Damascus ( <i>n</i> = 18)                                    | 22.2%                            | 5.6%    | 44.4%  | 27.8% |
| Kefallinia ( <i>n</i> = 1)                                   | 0.0%                             | 0.0%    | 100.0% | 0.0%  |
| Indigenous Greek<br>( <i>Capra prisca</i> ) ( <i>n</i> = 50) | 28.0%                            | 22.0%   | 22.0%  | 28.0% |
| Murciano-Granadina<br>( <i>n</i> = 13)                       | 69.2%                            | 0.0%    | 23.1%  | 7.7%  |
| Saanen ( <i>n</i> = 5)                                       | 60.0%                            | 0.0%    | 20.0%  | 20.0% |
| Skopelos ( <i>n</i> = 5)                                     | 20.0%                            | 20.0%   | 40.0%  | 20.0% |

<sup>1</sup>: proportions refer to farms with the same breed of animals; <sup>2</sup>: the term used by the respective farmers to refer to a variety of small-scale breeds, not always related between them, and each one prevailing only in some areas of the country with limited geographic dissemination
